## Review Article

# Protein tyrosine phosphatases in cell adhesion

Katherine A. Young<sup>1</sup>, Laura Biggins<sup>2</sup> and  Hayley J. Sharpe<sup>1</sup>

<sup>1</sup>Signalling Programme, Babraham Institute, Babraham Research Campus, Cambridge CB22 3AT, U.K.; <sup>2</sup>Bioinformatics, Babraham Institute, Babraham Research Campus, Cambridge CB22 3AT, U.K.

**Correspondence:** Hayley J. Sharpe ([Hayley.sharpe@babraham.ac.uk](mailto:Hayley.sharpe@babraham.ac.uk))

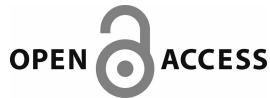

Adhesive structures between cells and with the surrounding matrix are essential for the development of multicellular organisms. In addition to providing mechanical integrity, they are key signalling centres providing feedback on the extracellular environment to the cell interior, and vice versa. During development, mitosis and repair, cell adhesions must undergo extensive remodelling. Post-translational modifications of proteins within these complexes serve as switches for activity. Tyrosine phosphorylation is an important modification in cell adhesion that is dynamically regulated by the protein tyrosine phosphatases (PTPs) and protein tyrosine kinases. Several PTPs are implicated in the assembly and maintenance of cell adhesions, however, their signalling functions remain poorly defined. The PTPs can act by directly dephosphorylating adhesive complex components or function as scaffolds. In this review, we will focus on human PTPs and discuss their individual roles in major adhesion complexes, as well as Hippo signalling. We have collated PTP interactome and cell adhesome datasets, which reveal extensive connections between PTPs and cell adhesions that are relatively unexplored. Finally, we reflect on the dysregulation of PTPs and cell adhesions in disease.

## Introduction

### Cell adhesion complexes and tyrosine phosphorylation

Cell adhesions are an essential feature of multicellular life and function as both mechanical links between cells and their environment and as major signalling hubs. In addition to maintaining tissue integrity, adhesion complexes must rapidly remodel to accommodate growth, renewal and repair. Reversible protein tyrosine phosphorylation, which expands the static proteome, allows dynamic changes to protein function that can facilitate such remodelling. The coordinated actions of protein tyrosine kinases and phosphatases (PTPs) control phosphotyrosine levels with high spatiotemporal specificity and are both key players in the regulation of cell adhesions. The repertoire of kinases and PTPs has expanded in concert with increased organismal complexity, reflecting a need for greater regulation and specificity [1]. In this review, we will focus on the PTPs and their impact on key adhesive complexes present in human epithelial and endothelial cells.

At their core, adhesions consist of transmembrane receptors that couple the cell exterior to the intracellular cytoskeleton, through adaptor proteins. Focal adhesions and hemidesmosomes comprise integrins localised to the basal plasma membrane that bind to extracellular matrix (ECM) components and link to intracellular actin and intermediate filaments (e.g. keratins), respectively (Figure 1). Both complexes function to attach cells to surrounding matrix and must undergo disassembly in order for cells to migrate or differentiate [2,3]. Hemidesmosomal integrins ( $\alpha6\beta4$ ) [4] link collagen to intermediate filaments through plectins and BP230 [5]. Focal adhesion integrins are key mechanosensors and can communicate the relative stiffness of the ECM to the cell interior [6]. This is in part mediated by the mechanosensitive adaptors, talin [7] and vinculin [8]. Conversely, they also mediate inside-out signalling in order to balance attachment with motility [9].

Received: 19 December 2020  
 Revised: 10 February 2021  
 Accepted: 12 February 2021

Version of Record published:  
 10 March 2021

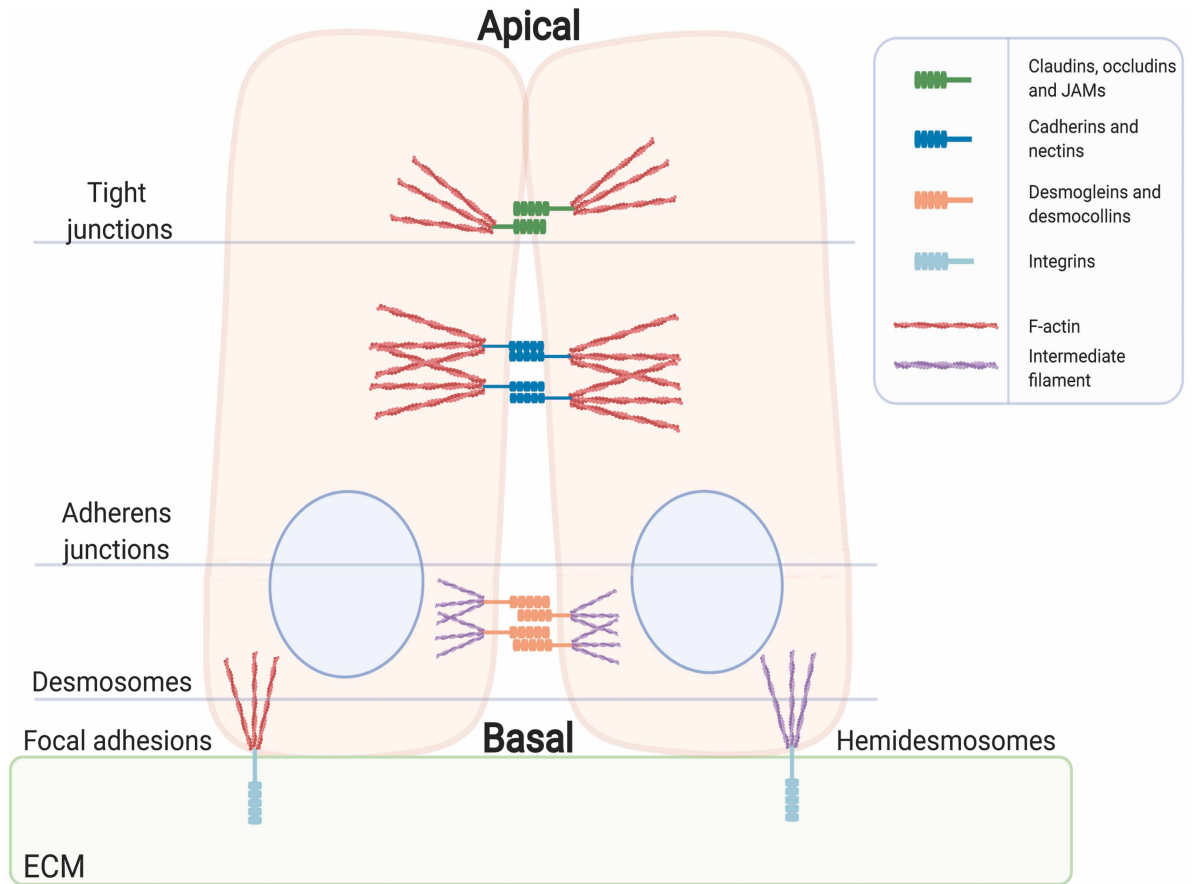

**Figure 1. Cell junctions and adhesions in epithelial cells.**

Tight junctions form apical diffusion barriers. Claudins, JAMs and occludins make up the intercellular plaque and are linked to the ZO adaptor proteins that bind to the actin cytoskeleton. Adherens junctions form basolaterally and are composed of cadherins that form trans homodimers between adjacent cells. The cadherin intracellular domains bind to catenins forming a complex that links to the actin cytoskeleton. Nectins also form part of the adherens junctional structure, and bind to the adaptor proteins Afadin and ZO-1. Desmosomes form structural attachments between cells linked to intermediate filaments. Hemidesmosomes provide a link between the extracellular matrix (ECM), via integrins  $\alpha 6$  and  $\beta 4$ , and intermediate filaments. Focal adhesions connect the ECM to the actin cytoskeleton. The cytoplasmic region of focal adhesion integrins bind to adaptor proteins such as talin and paxillin, which are linked to the actin cytoskeleton via vinculin. Signalling complexes are recruited to adhesion sites and include adaptor proteins as well as focal adhesion kinase (FAK).

Cells are connected to each other through various complexes. Nectins and classical cadherins form heterotypic and homotypic cell junctions connected to the actin cytoskeleton. The classical cadherins bind the armadillo domain-containing  $\beta$ -catenin protein through their short intracellular domains, forming a basic adherens junction complex.  $\alpha$ -catenin binding links this complex to the actin cytoskeleton and the  $\delta$ -catenins, including catenin  $\delta$ -1 (p120<sup>Cat</sup>), regulate the surface levels of the cadherins [10]. Vinculin can bind to catenins at cell–cell junctions and transmit force to the cytoskeleton, stimulating actin polymerisation [11]. Nectins are connected to actin through the large scaffolding protein Afadin (AF6/MLLT4) [12]. Desmosomes consist of desmoglein and desmocollin cadherin-subfamily proteins and are linked to intermediate filaments, such as keratins, through desmoplakin [13]. They give structural integrity to tissue such as the skin, where they are best studied. The plakophilins are part of the  $\delta$ -catenin family and have diverse roles, including the regulation of desmosome stability [14]. Finally, tight junctions, comprising occludins, junctional adhesion molecules (JAMs) and claudins, form an apical, selectively permeable barrier between cells and are connected to the actin cytoskeleton through zonula occludens (ZO) family proteins [15] (Figure 1).

All of the complexes described undergo extensive tyrosine phosphorylation of core and peripheral components and are therefore subject to control by kinases and PTPs. We aim to review the growing evidence for the involvement of human PTPs in cell adhesion regulation and how their dysregulation might contribute to disease. We will also discuss their roles in epithelial to mesenchymal transitions (EMT) and associations with Hippo signalling, a key pathway that links adhesion signalling to transcriptional responses. Finally, we highlight how understanding the role of PTPs in cell adhesion may reveal avenues for therapeutic manipulation in cancer and disease.

## Overview of the human PTP family

Phosphatases are a diverse set of enzymes having converged on multiple mechanisms to catalyse the hydrolysis of phosphate bonds [1]. The human classical PTPs are part of a larger family of cysteine-based phosphatases that share a core CX<sub>5</sub>R catalytic motif [16] and includes lipid phosphatases, such as PTEN, and the dual-specificity mitogen-activated protein kinase (MAPK) phosphatases. Beyond this motif, the 37 classical tyrosine-specific phosphatases are defined by additional catalytic motifs [17], including a phosphotyrosine recognition loop that forms a deep pocket that excludes smaller phosphorylated amino acids such as serine and threonine. Besides a phosphatase domain, most PTPs possess additional domains that are critical for their localisation and function [17] (Figure 2). Six of the 37 classical PTPs are classified as pseudophosphatases (PTPRU, PTPRN, PTPRN2, PTPN23, PTPN14 and PTPN21) due to sequence variants in the highly conserved catalytic motifs that predict an impairment or loss of catalytic activity [18]. In addition, 12 of the receptor-linked PTPs (RPTPs) contain tandem phosphatase domains in which the membrane-proximal domain is catalytically active and the distal domain is a pseudophosphatase domain.

PTPs are challenging to study. There is a lack of chemical tools and a requirement for an upstream stimulus for phosphorylation. An additional bottleneck for the field is the identification of direct substrates. Unlike many kinases, tyrosine phosphatases show little specificity at the peptide level, precluding bioinformatic prediction of substrates. Although substrate-trapping mutants have been identified, it is apparent that these do not work consistently for all PTPs therefore empirical tests are required to identify a suitable mutant [19,20]. Even then, substrate-trapping alone does not prove that a protein is a direct substrate. Likewise, modulation of protein phosphorylation by deletion or overexpression of a PTP is also not sufficient to assign substrate status due to potentially indirect or global responses. Once a candidate substrate has been identified it is common practice to purify or isolate a PTP and carry out a dephosphorylation assay. This might be done in-gel [21], in-lysate [22] or *in vitro* [23]. A specificity control should be included within the same experiment, for example, a protein or phosphosite that is not dephosphorylated. Thus, identification of direct substrates should satisfy three key criteria: protein–protein interaction, modulation of tyrosine phosphorylation status in living cells and evidence of direct dephosphorylation. In this review, if we refer to a PTP substrate, we have confirmed that published data meet these three criteria. Where this is not the case we will simply describe the reported effects on particular proteins.

Several PTP families possess domains typically associated with adhesion complexes. For example, RPTPs have extracellular fibronectin, immunoglobulin and MAM (meprin, A-5 protein, and receptor protein-tyrosine phosphatase mu) domains, which mediate adhesion in other cell surface receptors. Furthermore, FERM (4.1 protein, ezrin, radixin, moesin) domains are present in 3 non-receptor PTP families, which typically link transmembrane proteins to the cytoskeleton and are particularly common amongst focal adhesion proteins [24]. Src Homology 2 (SH2) domains, found in the N2 family, are important in building signalling complexes by recruiting and binding to phosphorylated proteins, forming a localised signalling hub [17]. These extracatalytic domains mean PTPs can also regulate signalling pathways as scaffold proteins [25–27]. PTPs have distinct subcellular localisations, as well as cell and tissue-specific expression profiles. For example, the RPTP CD45, a commonly used marker of nucleated haematopoietic cells, has been implicated in cell adhesion processes [28–30]. However, haematopoietic PTPs will not be discussed in this review. For simplicity, we will focus on PTPs expressed in human epithelial and endothelial cell types (shown in bold in Figure 2) and briefly highlight neuronal PTPs involved in axon guidance and synaptogenesis.

## PTPs and cell adhesion complexes

Cell adhesion complexes are formed of a transmembrane receptor and adaptor proteins that couple to the cytoskeleton. These complexes can form between neighbouring cells or anchor the cell to the ECM. Tyrosine

## Non-Receptor PTPs

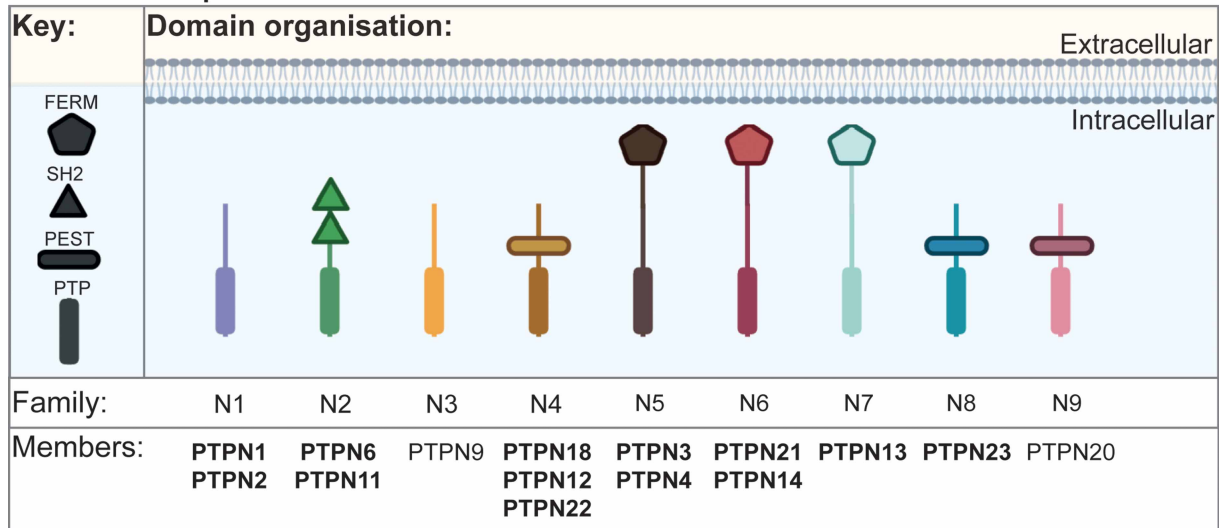

## Receptor PTPs

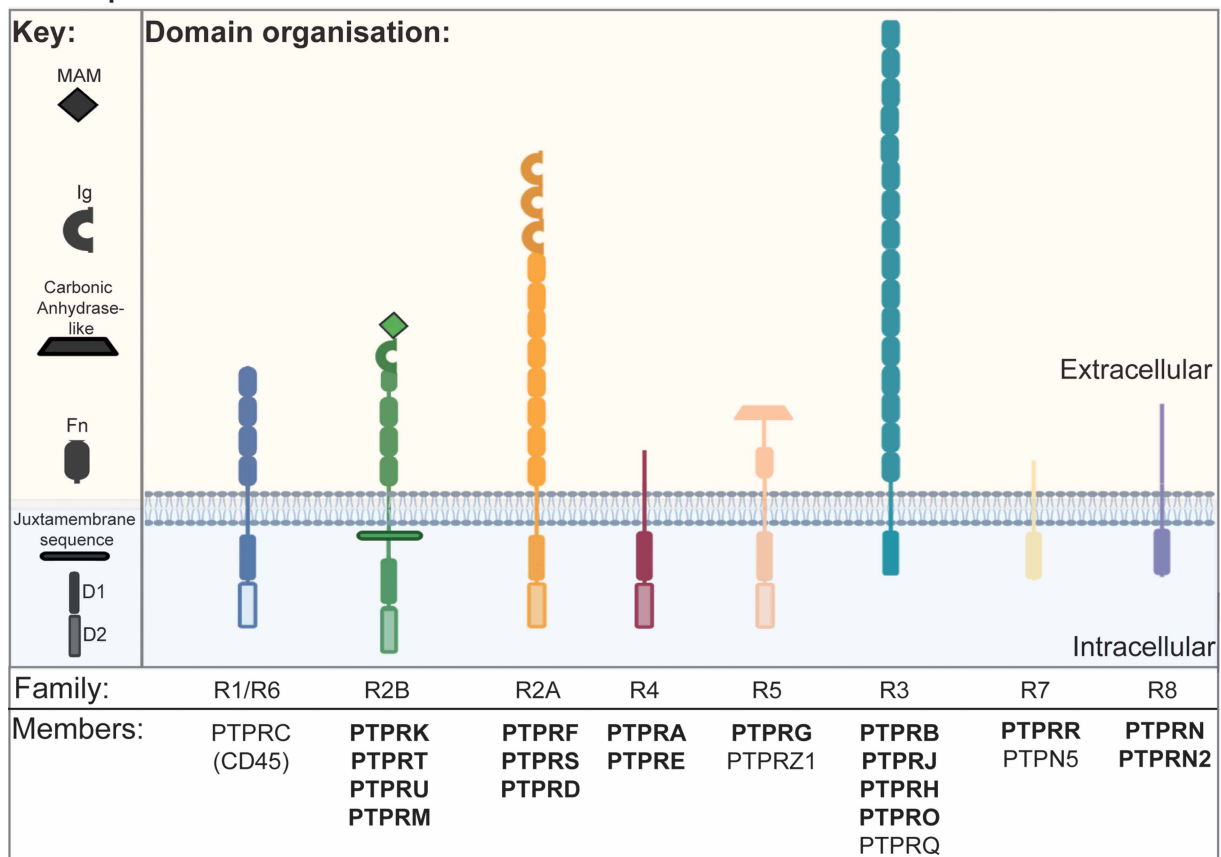

**Figure 2. Schematic of the classical PTPs.**

There are 37 human classical PTPs, which can be divided into 16 non-receptor PTPs within nine subtypes (N1–N9) and the 21 receptor PTPs comprise of eight subtypes (R1–R8). Five out of the eight receptor PTPs have tandem intracellular phosphatase domains; an active membrane proximal D1 domain and an inactive pseudophosphatase D2 domain. The non-receptor PTPs possess additional domains shown in the key. The PTPs in bold represent those that are found in epithelial, endothelial and neuronal cell types and will be discussed in this review.

phosphorylation can regulate adhesion complexes by inducing conformational changes or facilitating the binding of additional proteins including regulatory enzymes, for example, through phosphotyrosine binding domains. Increased tyrosine phosphorylation can correlate with both cell–cell [31–34] and cell–matrix [35] adhesion formation and disassembly. Adhesion remodelling can be initiated by a number of stimuli such as mechanical force [36], reactive oxygen species (ROS) [37] or growth factors and cytokines [38,39]. There are established roles for focal adhesion kinase (FAK) and Src family kinases (SFKs) in these processes, however, the functions of PTPs are less well defined. Nevertheless, the PTPs function with kinases to tightly control protein phosphorylation and many are important regulators of cell adhesion. Furthermore, the adhesive structures in the extracellular domains of RPTPs mean they are well positioned to sense adhesive cues and couple these to intracellular signalling, an area that remains poorly understood [40].

In evolutionary terms, phosphotyrosine signalling, and particularly PTPs, pre-date multicellularity [41]. Genes encoding phosphotyrosine machinery underwent significant expansion in metazoa [1], consistent with its critical role in the regulation of increasingly complex adhesive processes. The first classical PTPs were orthologs of PTPN1 (PTP1B) and PTPN12 (PTP-PEST) and were present in single-celled amoeba alongside Rho GTPases, integrins and  $\beta$ -catenin, predating classical tyrosine kinases [42]. PTPRF, or LAR, was the first receptor PTP, arising in unicellular choanoflagellates such as *Monosiga Brevicollis* along with the first cadherins [43].

To gain insight into the connectivity between human PTPs and cell adhesion complexes we analysed published proteomics datasets. The use of proximity labelling by BioID [44] and mass spectrometry to define ‘adhesomes’ has built up a comprehensive picture of their core components. We collated data from recently reported adhesomes for five major adhesion complexes: tight junctions [45], adherens junctions [46], hemidesmosomes [47], desmosomes [48] and focal adhesions [49,50]. We included an interactome of the mammalian Hippo signalling pathway [51], which links cell adhesion to transcriptional responses. PTP interactomes have been determined using similar proximity labelling as well as affinity-purification approaches coupled to mass spectrometry [22,52,53]. Finally, we included curated PTP-substrate interactions from the human DEPhosphorylation Database DEPOD [54]. These interactions are detailed in a Supplementary File.

Combining these datasets reveals extensive interactions between PTPs and adhesion complex proteins (Figure 3). Several PTPs show connections to multiple adhesion complexes, suggesting they could mediate cross-talk. Furthermore, multiple PTPs are present within adhesomes (depicted by blue lines). This includes PTPN13 (PTP-BAS) and PTPN12 (PTP-PEST) in focal adhesions and PTPRJ in tight junctions. There are established roles for PTPs in cell adhesion (see below), however, this analysis indicates widespread involvement in all major adhesion complexes and Hippo signalling in epithelial and endothelial cells. Although many connections between PTPs and desmosomes and hemidesmosomes exist there are very few functional studies and will therefore not be discussed.

## PTP regulation of cell–cell junctions

### Epithelial adherens junctions

Adherens junctions have the fundamental role of establishing mechanical integrity in animal tissues [55]. They are composed of cadherin–catenin modules that dynamically interact with the cytoskeleton to provide robust adhesions between neighbouring cells [56]. These modules are regulated by tyrosine phosphorylation that can mediate the binding or dissociation of additional proteins. Furthermore, tyrosine phosphorylation can regulate the endocytosis of cadherin–catenin clusters during junction remodelling [57,58], however, the specific mechanism behind this remains unclear [59,60]. Nevertheless, multiple PTPs are required to coordinate the regulation of adherens junctions, in addition to tyrosine kinases such as Eph receptors, epidermal growth factor receptor (EGFR) and SFKs [39,61].

The cell surface localisation of RPTPs mean they are well placed to regulate cell contacts. For example, PTPRK loss of function leads to decreased junctional integrity in mammary epithelial cells and hyperphosphorylation of human p120<sup>Cat</sup> at two sites: Y228 and Y904 [22]. PTPRK, and the related receptor in the type 2B family of RPTPs (R2B) PTPRM, can directly dephosphorylate both phosphosites (Figure 4) [22,62]. Phosphorylation of the Y228 site occurs during the formation of adherens junctions [34] and can promote binding between p120<sup>Cat</sup> and the GTPase, RhoA [63]. Interestingly, increased phosphorylation of this residue correlates with the invasiveness of glioma cells [64]. PTPRJ also reportedly dephosphorylates this site (Figure 4) [65]. Another R2B receptor, PTPRT, which is predominantly expressed in the brain [66,67], has been found to interact with a number of adherens components including E-cadherin, p120<sup>Cat</sup> and  $\beta$ -catenin [68]. Furthermore,



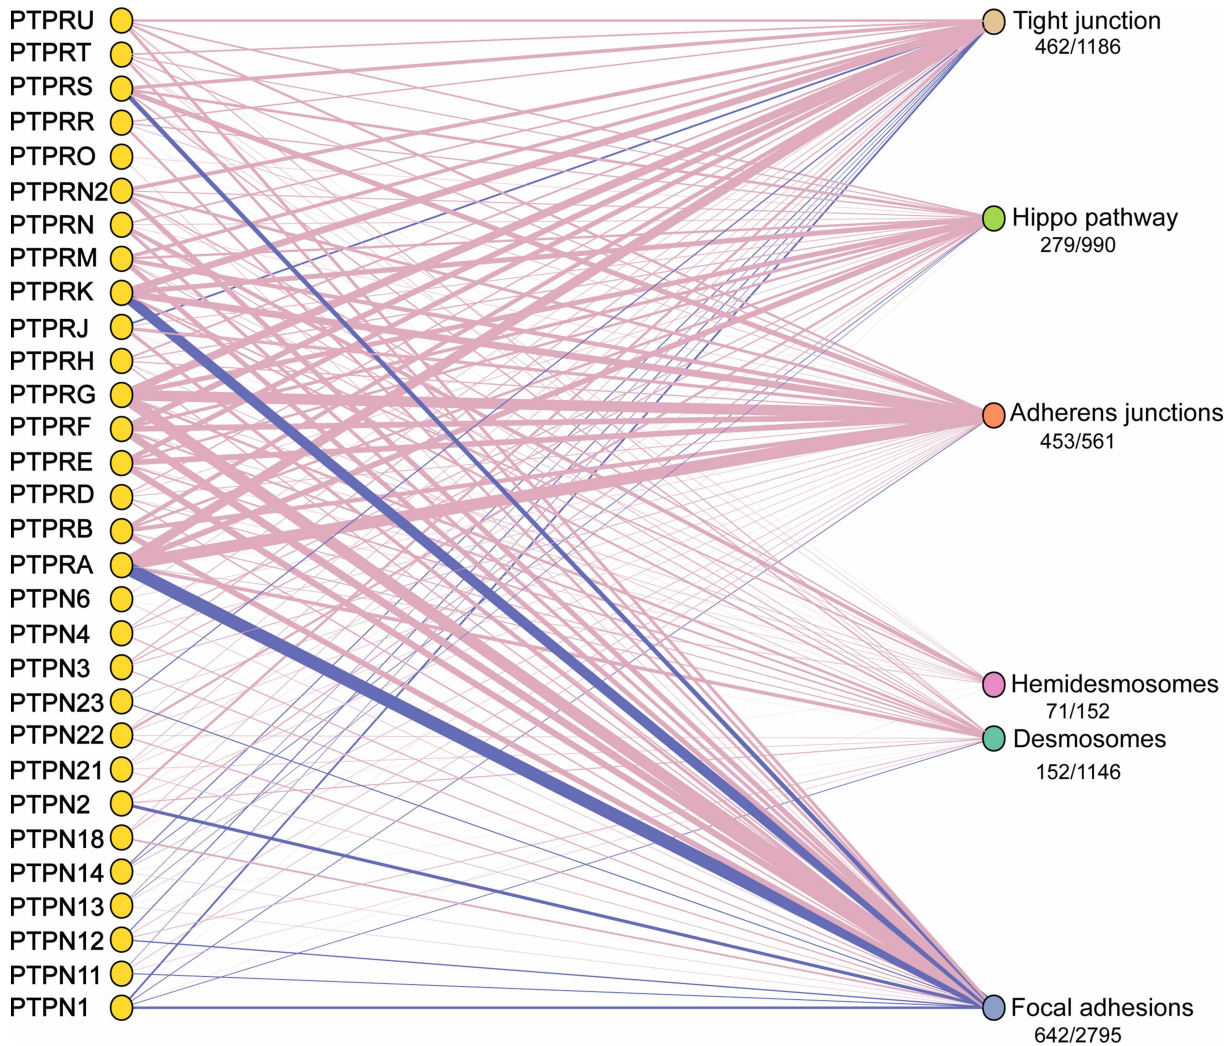

**Figure 3. PTP interactions with cellular adhesion components.**

Published PTP and adhesion complex interactomes were collated. Additionally, we included the interactome of Hippo pathway components and high quality PTP-substrate interactions curated in DEPOD. After removing redundant interactions, a network was generated using the igraph package in R. Pink edges represent a PTP interaction with at least one protein within an adhesome or pathway and blue edges indicate the presence of a PTP within a given adhesome or pathway dataset. The thickness of the edges between nodes represents the number of unique PTP interactions. Ratios beneath adhesome/pathway names indicate the proportion of proteins in each dataset that intersect with PTP interactomes. Full interaction details can be found as a supplement to this review.

the catalytically inactive R2B paralog, PTPRU, binds to PTPRK substrates including p120<sup>Cat</sup> and the actin binding protein, Afadin [27] and is proposed to sequester substrates away from related PTPs, including PTPRK and PTPRM, protecting them from dephosphorylation. This suggests that multiple RPTPs can act on the same phosphosite, however, their distinct expression profiles, activities and subcellular localisation will determine their specific roles in cell junction regulation. PTPRA is also required for junctional integrity, but through a distinct mechanism. PTPRA promotes Src activity in epithelial cells. When PTPRA is knocked down, Src substrate phosphorylation is decreased, including cortactin, leading to compromised cell junctions [69]. Finally, our adhesome datasets analysis reveals strong links between PTPRF and PTPRG with adherens junction proteins (Figure 3).

Non-receptor PTPs also regulate cell junctions. For example, SH2-domain containing PTPN6/SHP1 also dephosphorylates p120<sup>Cat</sup> [70] and following adherens junction disassembly it associates with internalised phosphorylated cadherin–catenin complexes [71]. Its paralog PTPN11/SHP2 can be found associated with vascular endothelial (VE)-cadherin complexes [72] and PTP1B binds to the cytoplasmic domain of cadherins and

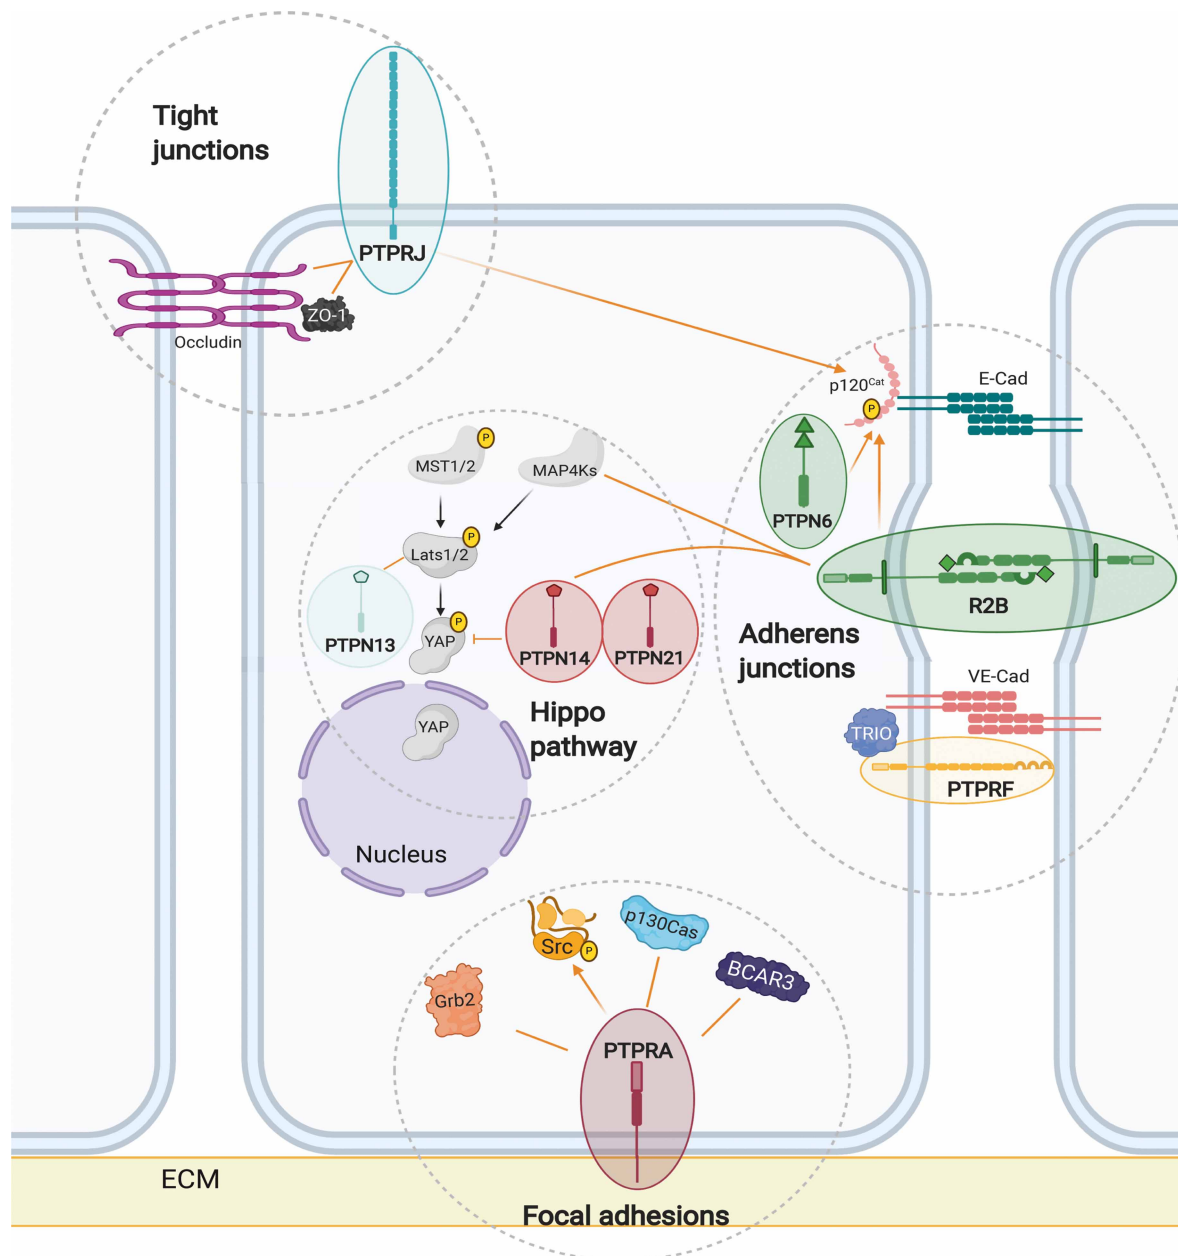

**Figure 4. PTP regulation of adhesion complexes and related pathways.**

Hippo pathway kinases regulate nuclear localisation of the transcriptional co-activators YAP1/TAZ. A direct inhibitory interaction occurs between YAP1 and the non-receptor PTPs PTPN14 and PTPN21. PTPN13 interacts with LATS2, but the functional relevance of this is unknown. A PTPRK substrate-trapping mutant bound the mitogen activated protein kinase MAP4K4/HGK. The receptors PTPRA, PTPRG, PTPRK, PTPRS and PTPRU reportedly interact with PTPN14 and/or PTPN13. Apically, PTPRJ interacts with ZO-1 and occludin at tight junctions. At epithelial adherens junctions, members of the R2B family and PTPN6 interact with p120<sup>cat</sup>; PTPRK and PTPRM can specifically dephosphorylate sites, Y904 and Y228. The R2B receptors can form a homophilic ‘spacer-clamp’ between adjacent cell membranes. At endothelial adherens junctions, NOTCH signalling triggers the formation of a complex between PTPRF, VE-cadherin and TRIO. At focal adhesions, phosphorylated PTPRA recruits a complex of breast cancer anti-estrogen resistance 3 (BCAR3), p130Cas and Grb2 and can dephosphorylate Src at the inhibitory phosphosite Y527.

can dephosphorylate  $\beta$ -catenin [73–75]. Inhibition of PTP1B disrupts E-cadherin adhesion and decreases the transepithelial resistance (TER) of epithelial monolayers [76].

Beyond these experimentally determined interactions between PTPs and individual cadherin and catenin proteins, our analysis of adhesome data indicates that members of all PTP families expressed in endothelial and epithelial cell types interact with at least one adherens junction component (Figure 3). Three RPTPs: PTPRA, PTPRK and PTPRG each had interactions with over 40 adherens junction adhesion proteins. Our analysis of interactome data indicates that the regulation of adherens junctions is finely tuned by an assortment of PTPs, perhaps in response to different stimuli or in different cell types and contexts.

## Endothelial adherens junctions

The endothelium lines the interior of blood vessels. Dynamic cell junctions mediate adhesion between adjacent endothelial cells and comprise VE-cadherin and adaptor proteins such as  $\beta$ -catenin [77]. Blood flow through the vascular endothelium generates fluid shear stress and a small pool of tyrosine phosphorylated VE-cadherin is essential for endothelial mechanotransduction to regulate vessel vasodilation [78]. Endothelial junctions must constantly remodel during angiogenesis, a process which is tightly regulated by tyrosine phosphorylation to ensure correct organisation of new vessels [79–81]. Vascular endothelial growth factor (VEGF) acts as the master regulator of blood vessel function and angiogenesis by binding to VEGF receptors and triggering signalling pathways [82], some of which are mediated by PTPs.

Several PTPs are highly expressed in blood vessels with the receptor PTPRB (VE-PTP) almost exclusively expressed in endothelial cells [66]. Consistent with its expression pattern, deleting or truncating *Ptprb* in mice leads to embryonic lethality due to defects in angiogenesis [83,84]. PTPRB promotes junctional stability in quiescent endothelial monolayers in a phosphatase-independent role by binding and inhibiting the Rho guanine nucleotide exchange factor (GEF), GEF-H1 [25]. The PTPRB-mediated inhibition of GEF-H1 reduced the VE-cadherin internalisation rate by limiting RhoA signalling at adherens junctions. These findings indicate a scaffolding role for PTPRB in vascular adhesion signalling.

PTPRM is also expressed in endothelial cells [85] and localised to the vasculature of all major organ systems [86]. In human pulmonary vascular endothelial cells, PTPRM regulates barrier integrity, possibly through the direct or indirect regulation of VE-cadherin phosphorylation [87]. A *Ptpm* knockout mouse model shows a defect in flow-induced dilation of mesenteric resistance arteries, implicating PTPRM control of the VE-cadherin–catenin complex in the regulation of shear stress mechanotransduction within the endothelium [88]. This could be mediated through its substrate p120<sup>cat</sup> [22,62]. PTPRF has also been implicated in endothelial barrier function through the formation of a receptor complex with VE-Cadherin and the Rac1 GEF, triple functional domain protein (TRIO) which activates Rac1 and adherens junction assembly [89].

Endoplasmic reticulum (ER)-localised PTPN1 (PTP1B) also regulates endothelial junctions. Deleting *Ptpn1* in mice resulted in enhanced angiogenesis following myocardial infarction [90] and increased skin angiogenesis during wound healing in a type-1 diabetes mouse model [91]. Furthermore, *Ptpn1* expression is up-regulated in a hindlimb ischaemia mouse model which is used to evaluate angiogenesis [92]. Mechanistically, PTP1B catalytic activity may suppress angiogenesis through negative regulation VEGFR2 signalling [92], which normally disrupts VE-cadherin-dependent cell–cell junctions leading to increased proliferation and angiogenesis [93]. In summary, both ubiquitously expressed and endothelium-specific PTPs combine their functions to maintain vascular integrity and support angiogenesis.

## Tight junctions

Tight junctions are vertebrate-specific apical connections between neighbouring epithelial cells that create a selective diffusion barrier to control paracellular permeability [94]. Similar structures are present in endothelial cells, but are not polarised in the same way. The extracellular components of tight junctions are composed of the tetraspan proteins: tricellulin, claudin and occludin, and the single transmembrane proteins, JAMs [15]. These transmembrane proteins interact with a cytosolic plaque consisting of the Par3–Par6 complex and the ZO proteins which link transmembrane components to the actin cytoskeleton [95]. These interactions are key for establishing and maintaining the integrity of cellular apico-basal polarity [96]. Tyrosine phosphorylation of tight junction proteins such as ZO-1, increases tight junction permeability [97]. A small number of tight junction components have well-characterised phosphotyrosine sites and have been reviewed previously [98]. Research on tight junction protein tyrosine phosphorylation has largely focused on the tetraspan protein occludin, which has three major phosphotyrosine sites (Y398, Y402 and Y473) that are phosphorylated by SFKs



[99–106]. Mutating these sites alters interactions with ZO proteins and the cSH2-domain of the p85 $\alpha$  regulatory subunit of phosphatidylinositol 3-kinase (PI3K), and sensitises cells to ROS-induced barrier disruption [105,106].

PTPN2 (TC-PTP) and PTPRJ have been implicated in occludin regulation. For example, PTPN2 deletion resulted in increased occludin tyrosine phosphorylation in Ang-1-stimulated brain endothelial cells and endothelial hyperpermeability, indicating a role for PTPN2 in blood brain barrier maintenance [107]. Occludin and ZO-1 interact with and are dephosphorylated *in vitro* by PTPRJ, which promotes epithelial cell barrier function through its phosphatase activity (Figure 4) [108]. PTPRJ localises to the apical plasma membrane of epithelial cells [109], and is a component of the tight junction adhesome (Figure 3). However, its large extracellular domain means it is unlikely to be accommodated within the closely apposed intercellular space of the tight junction (Figure 2). This raises questions about how this RPTP regulates tight junctions. One possibility is that PTPRJ dephosphorylates tight junction components to prevent them from becoming ‘active’ in the wrong cellular location or to delimit tight junctions.

Relatively few PTPs have been identified as direct regulators of tight junctions in comparison with adherens junctions and less is known about the role of tyrosine phosphorylation in coordinating tight junction dynamics. Our adhesome analysis suggests a much wider involvement of both receptor and non-receptor PTPs in tight junction regulation (Figure 3).

## PTP regulation of cell–matrix adhesions

### Focal adhesions

Focal adhesions are mechanosensitive, integrin-based adhesions linking the actin cytoskeleton to the ECM allowing the cell to sense and adapt to changes in their immediate extracellular environment [2]. Tyrosine phosphorylation is a key signalling event at the formation and disassembly of focal adhesions [110]. In particular, the tyrosine phosphorylation of FAK recruits a number of different adhesion proteins by providing docking sites for components containing SH2 domains, such as Src [111]. Downstream signalling can alter cytoskeletal dynamics to generate mechanical force for cell motility. It is vital that these pathways are under tight control by tyrosine kinases and phosphatases in order to coordinate the correct responses to internal and external stimuli.

The receptor PTPRF (LAR) reportedly localises to focal adhesions [112]. It also associates with numerous focal adhesion proteins according to proximity labelling experiments, and plays a role in retraction fibre formation during mitosis, a process coordinated by focal adhesion proteins [53]. PTPRF is also a scaffold for the cell-cycle-regulated protein, DEPDC1B, and coordinates focal adhesion disassembly during the transition from interphase into M-phase [113]. Its extracellular domain can interact with ECM components including the laminin–nidogen complex [114] and heparan sulfate proteoglycans (HSPGs) [115]. Furthermore, the Slit- and Trk-like (SliTrk) family protein SliTrk1 functions in neuronal synaptogenesis through an interaction with the PTPRF extracellular immunoglobulin domains [116,117]. A direct link between extracellular binding events and altered phosphatase activity remains to be established. However, PTPRF clustering through the interaction with an intracellular ligand liprin- $\alpha$  interferes with its phosphatase activity [118]. A proposed mechanism by which PTPRF promotes cell-ECM adhesion is through an interaction with c-Abl, triggering Akt signalling and CDK1 activation [119]. Homozygous PTPRF loss-of-function mutations lead to amastia, or absence of breast tissue in humans [120]. Homozygous *Ptprf* knockout mice have revealed this is due to premature involution of the mammary gland [121]. Whether this is due to dysregulation of phosphotyrosine signalling and/or cell–matrix adhesions remains to be determined.

PTPRA is also a key phosphatase needed to coordinate integrin signalling events during the formation of focal adhesions. PTPRA dephosphorylates the inhibitory Src Y527 phosphosite [122,123], relieving autoinhibition, which leads to FAK phosphorylation and the formation of a SFK–FAK complex [124]. Consequently, *Ptpra* null mouse embryonic fibroblasts (MEFs) display impaired cell spreading and migration [124,125]. Interestingly, PTPRA itself is phosphorylated by the SFK–FAK complex on its C-terminal tail at site Y789. This occurs downstream of the initial Src dephosphorylation and is required for cytoskeleton-associated signalling and migration [126]. Phosphorylated PTPRA at focal adhesions recruits a complex of breast cancer anti-estrogen resistance 3 (BCAR3) and p130Cas [127] in addition to Grb2 [128,129] and Src [130] (Figure 4). These data implicate PTPRA as a key regulatory node in focal adhesion signalling, in addition to its role in cell–cell adhesion.

PTPN12 (PTP-PEST) is a focal adhesion regulator recruited to its substrate FAK by PIN1 (protein interacting with NIMA 1). It directly dephosphorylates FAK Y397, an autophosphorylation site that facilitates binding to SFKs, phosphoinositide 3-kinase (PI3K) and phosphoinositide phospholipase C gamma (PLC $\gamma$ ). PTPN12 dephosphorylation of FAK reduces the number of focal contacts and consequently increases migration [131,132]. In line with its function at focal adhesions, PTPN12 suppresses glioblastoma invasion [133]. PTPN12 interacts with valosin-containing protein (Vcp) and modulates its phosphorylation at Y805, leading to the segregation of Cas and its subsequent degradation via the ubiquitin- proteasome system. In the absence of PTPN12, Cas is stabilised leading to increased focal adhesion disassembly. Consistent with this proposed function, *PTPN12* mRNA levels are down-regulated in invasive intratumoral regions of glioblastoma [133].

PTP1B has been shown to both promote [134–136] and inhibit [137–139] cell–matrix adhesions depending on the cell type and context. Quantitative phosphoproteomics analysis of *Ptpn1* null MEFs revealed hyperphosphorylated tyrosine residues on a number of adhesion-related proteins, including paxillin and caveolin-1 [140]. Following on from this, studies have validated several of these proteins as PTP1B substrates, including cortactin [141] and EphA3 [142]. PTP1B localises to the ER through its C-terminal tail [143], suggesting it functions at ER-plasma membrane contacts [144]. Indeed, Hernández et al. demonstrated that PTP1B is positioned at paxillin-rich sites of cell–matrix adhesion through extensions of the ER and this localisation aids in maturation and stabilisation of focal adhesions [145]. In addition to the direct dephosphorylation of specific focal adhesion complex proteins, PTP1B can regulate cell–matrix adhesion signalling by dephosphorylating and activating Src, which regulates the Rho GTPase signalling network, influencing adhesion stability and lamellipodial protrusions [146].

In addition to the defined roles for PTPRA, PTPRF, PTPN12 and PTP1B in focal adhesion biology, other PTPs are associated with focal adhesions (Figure 3). In particular, the non-receptor PTPs PTPN2/TC-PTP and PTPN18 have an enrichment of connections with focal adhesions compared with other adhesomes. In fact, six non-receptor PTPs (PTPN2, PTP1B, PTPN11, PTPN12, PTPN23, PTPN9) are found within focal adhesomes (Figure 3) [49,50]. This indicates that a broader role for non-receptor PTPs at focal adhesions is yet to be explored.

## PTP regulation of Rho GTPases and cell migration

Downstream of integrin engagement, the Rho GTPase network is vital for mediating the intracellular responses that regulate cell adhesion and spreading [147]. GEFs promote the GTP-bound, effector-binding state of Rho GTPases that can generate specific signalling responses [148]. In contrast, GTPase-activating proteins (GAPs) promote GTP hydrolysis and signal termination. These GEFs and GAPs are regulated by multiple signalling events including serine/threonine and tyrosine phosphorylation. Several PTPs regulate GEFs and GAPs, either by direct dephosphorylation, as scaffolds or by recruiting other proteins which can modulate their activity [149].

PTPN12 interacts with and modulates the phosphorylation of VAV2, a RhoA and Rac1 GEF as well as p190RhoGAP, a Rho GAP in cells. This is proposed to coordinate VAV2 and p190RhoGAP activities to couple protrusions at the leading edge with tail retraction at the rear, in order to coordinate cell migration [150,151]. p190RhoGAP activity is also linked to PTPN11/SHP2 catalytic activity, indicating a potential regulatory interaction [152]. As highlighted above, PTPRB binds and inhibits the RhoGEF, GEF-H1, leading to reduced RhoA activity at endothelial adherens junction. The exact mechanism of PTPRB-mediated GEF-H1 inhibition is unknown, however, it is proposed to stabilise its inactive conformation, preventing RhoA binding [25]. Finally, PTPRF can bind to the Rac1 GEF, TRIO, but does not dephosphorylate it suggesting a further RPTP scaffold function (Figure 4) [53,153]. In endothelial cells, shear stress can activate NOTCH1 signalling to assemble a mechanosensory complex consisting of PTPRF, VE-cadherin and TRIO. This complex induces Rac signalling and junction assembly to promote barrier function [89]. Thus, PTPs can regulate both the localisation and phosphorylation status of Rho GTPase regulators allowing fine tuning of specific signalling processes that are now being uncovered.

## PTP regulation of Hippo signalling

First described in *Drosophila*, the Hippo signalling has emerged as a key mechanotransduction pathway, linking cell adhesion to transcriptional responses [154]. Fundamentally, the pathway controls the nucleocytoplasmic shuttling of the transcriptional co-activators, YAP1 and TAZ. When the core kinases of the pathway

are active, YAP1/TAZ are phosphorylated leading to their retention in the cytoplasm. However, when the kinase portion of the pathway is 'off', dephosphorylated YAP1/TAZ accumulate in the nucleus where they can drive expression of genes involved in cell proliferation and survival (Figure 4) [155]. The pathway is regulated by cell density and extensively linked to cell junctions and cytoskeletal dynamics [156]. Given their extensive roles in cell adhesion, the PTPs are ideal candidates to regulate Hippo signalling.

PTPN13 and PTPN14 are present in the Hippo pathway interactome (Figure 3) and PTPN14 is functionally linked to the pathway. YAP1 directly interacts with a PTPN14 PPxY motif, through its WW domain. This interaction sequesters YAP1 in the cytoplasm, inhibiting its transcriptional co-activator function in a cell-density dependent manner [157,158]. The PTPN14 paralog, PTPN21, can also bind to YAP1 and limit its activity [159]. PTPN13 interacts with LATS2, a core Hippo pathway kinase, but the functional consequences are unknown (Figure 4) [51].

Several RPTPs had enriched interactions with the Hippo pathway including PTPRK (Figure 3). PTPRK can form a substrate-trapping interaction with mitogen-activated protein kinase kinase kinase 4 (MAP4K4, or HGK) [22], a component of the expanded Hippo pathway [160], raising the possibility that PTPRK is an upstream regulator (Figure 4). Five RPTPs (PTPRK, PTPRG, PTPRA, PTPRS and PTPRU) were found to interact with PTPN13 and/or PTPN14 suggesting the involvement of a complex PTP network in the Hippo signalling regulation (Figure 4). Indeed, the membrane-bound RPTPs are well positioned to act as signal transducers of mechanical cues generated from changes in cell adhesion.

## Regulation of PTPs at cell adhesions

We have described how PTPs regulate cell adhesions, however, cell adhesions can also feedback to PTPs to control their activity and localisation. This is particularly true for cell surface RPTPs. For example, the R2B receptor family form extracellular homophilic interactions that stabilise the receptors at cell–cell contacts [22,161–164]. Following structural studies on the extracellular domain of PTPRM, it was suggested that the rigid trans dimers could act as a 'spacer-clamp' between adjacent membranes, locking receptors into a specific location to allow spatiotemporal regulation of local substrates (Figure 4) [165]. Intriguingly, the predicted extracellular domain length of PTPRM (~30 nm) is longer than the anticipated intercellular distance for a mature E-cadherin junction (~18.5 nm) [166]. Thus, it might be expected that R2B receptors are spatially separated from mature adherens junctions, which has been observed by super-resolution microscopy [22]. This suggests that these receptors may function primarily in assembly and disassembly of junctions due to their exclusion from mature junctions.

PTP oxidation is another regulatory mechanism that can occur at cell adhesions. Reactive oxygen species (ROS), such as hydrogen peroxide ( $H_2O_2$ ), are important regulators of wound healing [167–169]. There is also growing evidence that ROS act as mediators of cell migration and cell–cell contact formation [170]. PTPs are well-established targets of cellular oxidation [171]. Their redox sensitivity is conferred by the reactive catalytic cysteine within the conserved HC(X<sub>5</sub>)R motif [172], which is important during nucleophilic attack on phosphate bonds but also renders it sensitive to oxidation and inhibition [173]. PTPs can undergo diverse reversible modifications upon oxidation, including disulfide bonds and adduct formation [174,175]. In a cellular setting, PTP oxidation can occur in response to various stimuli, including the local production of extracellular superoxide by plasma membrane-localised Nicotinamide adenine dinucleotide phosphate (NADPH) oxidase (NOX) enzymes, in response to activation of cell surface receptors by ligands such as epidermal growth factor (EGF) and transforming growth factor (TGF) $\beta$  [176]. Superoxide dismutase (SOD), converts superoxide to  $H_2O_2$ , which is thought to enter cells through aquaporins [177]. In addition, focal adhesion formation is accompanied by a significant but transient increase in  $H_2O_2$  production [178]. It has been postulated that this influx of  $H_2O_2$  may act to inhibit PTP catalytic activity thereby promoting the phosphorylation of downstream integrin mediators, such as FAK [178,179]. ROS production at focal adhesions in endothelial cells involving the NOX subunit p47<sup>phox</sup> was proposed to oxidise PTPN12 (PTP-PEST), downstream of Rac GTPase activation [180]. p47<sup>phox</sup> was recruited to focal adhesions by scaffolding proteins Hic-5 and TRAF4. Hic-5 had previously been shown to recruit PTPN12 to focal adhesions [181]. PTPN12 inactivation at focal adhesions was speculated to act in a positive feedback loop to promote activation of Rac and initiate membrane ruffling.

Rac is a known NOX activator [182], promoting ROS production in response to various stimuli including cytokine stimulation [183] and cell contact formation [184]. The activation of Rac1 has been shown to promote  $\alpha$ -catenin phosphorylation via ROS production resulting in loss of cell–cell adhesion [185].

Interestingly, as the PTPs increasingly become recognised as key regulators of Rho GTPase GEFs and GAPs, the Rac1-mediated production of ROS suggests a potential additional layer for regulation through PTP inactivation. The acute control of PTPs by oxidation adds further complexity to their spatiotemporal regulation and potential functions at cell adhesions, particularly as PTPs show distinct susceptibilities to oxidation [186]. Furthermore, PTP oxidation exhibits cell and tissue-specific patterns, which change with age, at least in mice [187,188]. This raises the possibility that cell adhesions may become dysregulated with age due to altered PTP oxidation.

## PTPs in the nervous system

During the development of the nervous system, cell adhesion is critical for promoting neurite connections and several PTPs have been implicated in regulating this process. PTPRM has been shown to regulate N-cadherin-dependent neurite outgrowth [162] and this is important during retinal development [189]. The type 2A family of RPTPs (R2A): PTPRF, PTPRD and PTPRS function in axon guidance, partly through interactions with diverse postsynaptic proteins. The function of the R2A receptors in synaptic organisation has been reviewed very recently [190], therefore we will only provide a brief summary.

The role of R2A RPTPs in axon guidance was first characterised in invertebrate systems by genetic studies. Leukocyte common antigen-related (dLar) is the *Drosophila* orthologue of the three mammalian R2A receptors and is highly expressed in developing neurons. dLar is critical for motor axon guidance decisions [191] and for the formation of neuromuscular junctions during synaptic development of larvae [115,192]. A number of dLar interactors are also important in *Drosophila* axon guidance, including Trio [193], Liprin- $\alpha$  [192] and Caskin [194]. Recent work on neural circuit wiring in *Drosophila* identified immunoglobulin superfamily cell adhesion molecule (CAM) Sticks and Stones (Sns) as a novel ligand for dLar [195]. The authors also demonstrated that PTPRD and PTPRF can bind to the human orthologue of Sns, Nephhrin. Interestingly, Nephhrin is a major component of the specialised intercellular contacts that form between kidney podocytes known as the slit diaphragm [196]. The interaction between the R2A receptors and Nephhrin indicates a potential role in regulating specialised cell junctions. PTP-3 is the sole R2A family orthologue in *C. elegans* and has two isoforms: PTP-3A and PTP-3B, which differ by length of the extracellular domain [197]. The two isoforms have been shown to have distinct roles; PTP-3A localises to presynaptic domains and contributes to synapse development, whereas PTP-3B functions extra-synaptically in axon guidance [198].

In vertebrates, the R2A family enact three general roles; mediating cell–cell adhesion at synapses, regulation of presynaptic differentiation and supporting postsynaptic differentiation [199]. The R2A receptors bind to chondroitin sulfate proteoglycan (CSPGs) and HSPGs, which are known to regulate axon guidance. Recently, the glycan sulphation patterns of HSPGs and CSPGs were shown to determine whether axonal growth is promoted or inhibited. This is proposed to be mediated by binding and modulating PTPRS activity. Heparan sulfate octa-saccharides promote ligand-induced PTPRS clustering that inhibits its phosphatase activity. Conversely, binding to tetra-saccharides such as chondroitin Sulfate promotes catalytically active PTPRS monomers [200]. A role for R2A family members in synaptic organisation in humans is supported by exonic single nucleotide polymorphism associations with several neuropsychiatric disorders such as restless leg syndrome [201] and ADHD [202].

Finally, there are emerging roles for the type 3 RPTPs (R3 family) in the field of axon guidance, in particular PTPRJ and PTPRO. Members of the R3 family are able to interact with and dephosphorylate Eph receptors, which coordinate axonal projections [203]. A recent study found PTPRJ may be a key regulator of retinocollicular projections in mouse retinas. PTPRJ expression is up-regulated during retina development and *Ptprj* knock out mouse retinas have misrouted axons. PTPRJ function in axon guidance is associated with the regulation of repulsive signals from Ephrin and c-Abl activities [204]. Thus, several RPTPs are important coordinators of axon guidance and synaptic adhesion.

## PTPs in cancer

Dysregulation of protein tyrosine phosphorylation is often a key driving event in oncogenesis leading to uncontrolled proliferation and cell survival. Despite functioning as negative regulators of tyrosine phosphorylation, PTPs can act as both tumour suppressors and oncogenes [205]. The likely tumorigenic outcome of dysregulated PTPs that control cell adhesion is increased invasiveness and metastasis, a key hallmark of cancer [206]. Consistent with this, numerous PTPs have been implicated in the regulation of EMT. Aberrant EMT can lead



to metastasis, contributing to cell dissemination from the primary tumour and colonisation of a new site. EMT is a reversible process in which epithelial cells lose their apical-basal polarity and loosen cell–cell contacts whilst undergoing an extensive reorganisation of the actin cytoskeleton to form a more spindle-like mesenchymal cell [207]. Cells in a mesenchymal state exhibit increased focal adhesions, and enhanced motility and invasiveness [208]. EMT is increasingly recognised as a continuum with intermediate states and cells displaying considerable plasticity [207]. A hybrid EMT cell state might be the most tumorigenic, having increased invasiveness compared with epithelial cells, while preserving the ability to colonise metastatic sites [209,210].

There are several examples where RPTP loss of function leads to increased cell motility and invasion including PTPRM and PTPRK in breast cancer [211,212], PTPRG in nasopharyngeal carcinoma [213] and PTPRS in hepatocellular carcinoma [214]. PTPRK was recently highlighted as a regulator of the EMT hybrid state [215], consistent with previous findings where PTPRK KO cells exhibited reduced junctional integrity and cell height, but did not undergo a full transition to a mesenchymal state [22]. PTPN9 overexpression suppressed invasion in breast cancer [216] and PTPN14 overexpression correlates with decreased invasion in several cancer cell lines [217]. In melanoma cells, PTPN14 interacts with and negatively regulates caveolin1 (CAV1) phosphorylation, preventing Rac1-mediated invasion [217]. PTPs can also promote invasion including PTPRU in glioma [218], PTPRJ in breast cancer [219], PTPRA in colon cancer [220] and PTPRZ in gastric cancer [221]. PTPRA regulates cellular contractility through SFKs and myosin light-chain kinase (MLCK) and its presence is required for colon cancer cell invasiveness [220]. PTPN18 is required for invasion in endometrial cancer cell lines [222] and PTPN11/SHP2 enhances the invasion and metastasis of ovarian cancer cells [223]. Thus, distinct PTPs can promote EMT, or the reverse process MET, suggesting a dynamic balance within the cell that can be tipped by altered PTP expression or activity (Figure 5).

PTPs are implicated in cancer through their cross-talk with Hippo signalling, which has been linked to solid tumour initiation and growth [224]. Indeed, YAP1 is an oncoprotein in several cancer types [225]. PTPN14 is a tumour suppressor in pancreatic cancer through inactivation of YAP1, functioning downstream of p53 [226]. Multiple somatic PTPN14 mutations have been associated with breast cancer, colon cancer and skin basal cell carcinoma suggesting an additional tumour suppressive role in preventing over-activation of the Hippo pathway in these cancer types [227–229]. The diverse roles of PTPs in cancers warrants further study in order

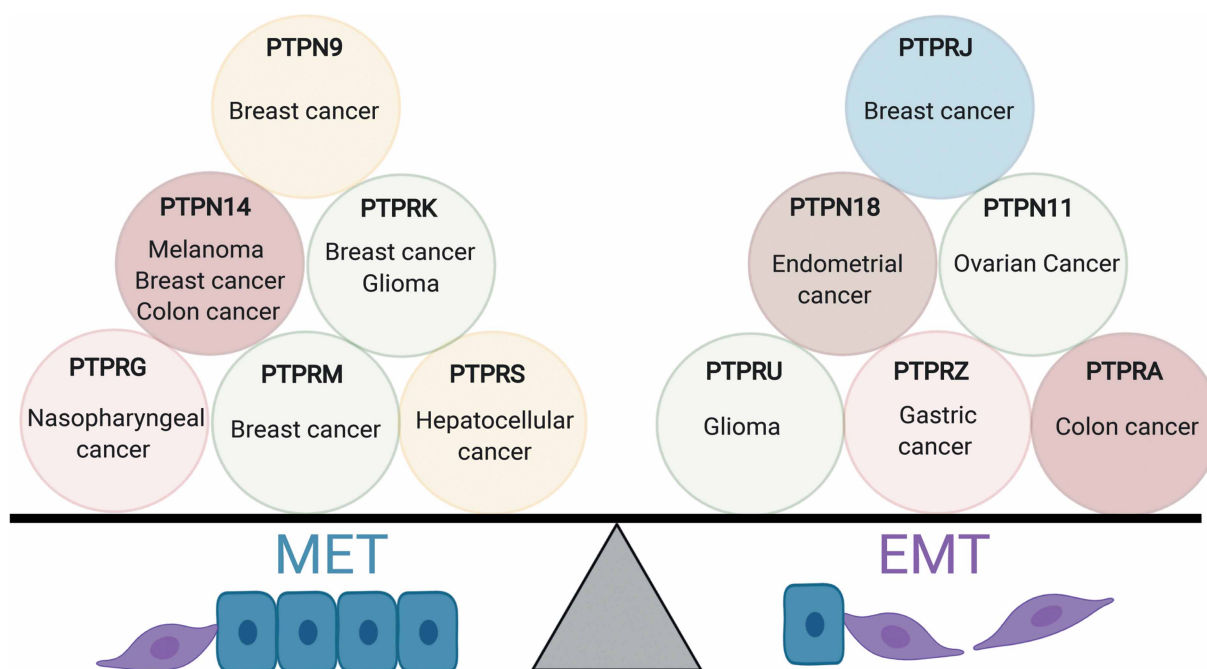

**Figure 5. PTPs control epithelial to mesenchymal plasticity in cancer cells.**

Changing the expression or activity of specific PTPs that control cell adhesions in different tissues or cell lines tips the balance towards a more epithelial or mesenchymal phenotype. In cancer this could manifest in metastasis-inducing behaviours.

to identify potential therapeutic targets downstream of tumour suppressive PTPs, or to target those that promote cancer states.

## PTPs as therapeutic targets

PTPs are important therapeutic targets in a number of disease settings [230,231]. It has historically been challenging to identify specific, bioavailable PTP inhibitors, due to their positively charged active sites and substrate recognition through specific protein–protein interactions, rather than at the peptide level. However, allosteric inhibitors have shown promise [232–234]. We will review the PTPs that are targets based on their roles in adhesive processes.

The receptor PTPRS is a target in spinal cord injury. PTPRS binds to extracellular CSPGs, which inhibit sensory neuron outgrowth during regeneration [235]. Deleting PTPRS in sensory neurons improves neural regeneration [235]. In contrast, high concentrations of PTPRS trap growth cones in a dystrophic state [236]. A peptide of the PTPRS intracellular wedge domain that was designed to prevent PTPRS clustering and administered to injured rats led, to promising serotonergic innervation to the spinal cord injury and subsequent recovery of the locomotive and urinary systems [236]. However, this is at odds with the recent suggestion that it is PTPRS catalytic activity that leads to impaired neural regeneration by dephosphorylation of cortactin [200]. The wedge domain of certain PTPs was previously described as a key regulator of PTPRA dimerisation and activity [237]. However, the LAR/PTPRF crystal structure did not indicate a role for the wedge domain in inter-domain contacts [238]. Similarly, the orthologous region in PTPRM is also not involved in dimer contacts [239]. Thus, the use of wedge domains to inhibit PTPs remains a controversial area.

Patients with cardiovascular diseases can exhibit compromised VEGF/VEGFR2 signalling resulting in impaired angiogenesis following injury [240]. A cell-permeable allosteric PTP1B inhibitor promotes endothelial cell migration by activating the DOCK180/Rac1 pathway without the requirement of VEGFR2 activation. This inhibitor could potentially be used to accelerate re-endothelialisation after vessel injury in these patients [241]. Also related to control of endothelial cells, the PTPRB-active site targeting inhibitor, AKB-9778, suppresses ocular neovascularisation and excessive vascular permeability in mice by activating the endothelial receptor tyrosine kinase Tie2, a reported target of PTPRB phosphatase activity [242]. Tie2 activation is a potential therapeutic avenue in diabetic macular edema. Unfortunately, in clinical trials, AKB-9778 treatment failed to achieve the primary endpoint [243], however, it was well-tolerated in patients and reached secondary endpoints. Further application of this inhibitor has been proposed in delaying tumour growth and preventing metastasis by stabilising tumour vessels [244].

PTPs remain challenging targets so it will be essential to understand specific regulatory mechanisms, signalling functions and protein–protein interactions to develop new approaches, such as allosteric modulators. Additionally, knowledge of substrates may reveal additional modalities to manipulate PTP activity, or further targets that mediate adhesive processes in disease. Finally, the key roles for RPTPs in cell adhesion control and EMT raises the possibility of targeting their extracellular domains, for example, with monoclonal antibodies [245].

## Concluding remarks

The recent explosion of proteomics datasets has enabled us to visualise the extensive connections between PTPs, core adhesive complexes and signalling pathways. Their involvement ranges from core scaffolding components within adhesive complexes to dynamic regulators of tyrosine phosphorylation. Although challenging to study, in part due to a lack of specific tools and a need to understand upstream phosphorylation, the PTPs are clearly central to the coordinated regulation of cell adhesion. Individual PTPs associate with multiple complexes, suggesting they could mediate cross-talk between adhesion types. Moreover, PTPs can confer precise, spatiotemporal control through distinct subcellular localisations and local control by upstream signals such as ROS. There are no general rules for how PTPs impact on adhesive processes. Just as PTPs can be both oncogenic and tumour suppressive, they can differentially regulate processes such as EMT. This highlights the need to understand the functions of each individual PTP in defined contexts. PTPs have historically been ‘undrugable’ targets, however, the recent development of allosteric inhibitors for SHP2 highlights the importance of understanding regulatory mechanisms to inform drug development. Many open questions remain. Multiple PTPs are associated with the adherens junction cadherin–catenin module. Do PTPs carry out redundant functions or do they fine tune the phosphorylation code within specific complexes? Several PTPs interact with

adhesive complex components, yet are likely to be excluded from the core complex, in particular the RPTPs. Additionally, they receive feedback from adhesions. Do PTPs play a role in delimiting adhesions or controlling their size? We anticipate that phosphoproteomics and interactome studies in 3D models such as organoids, as well as super-resolution microscopy, will uncover the interplay between PTPs and cell adhesions, as well as their roles in signalling to elicit transcriptional or metabolic changes.

### Competing Interests

The authors declare that there are no competing interests associated with the manuscript.

### Acknowledgements

H.J.S. is supported by a Sir Henry Dale Fellowship jointly funded by the Wellcome Trust and the Royal Society [109407] and a BBSRC institutional programme grant [BBS/E/B/000C0433]. K.A.Y. is supported by a CRUK PhD studentship. L.B. is funded by Biotechnology and Biological Sciences Research Council core funding to the Babraham Institute. Figures 1, 2, 4, and 5 were created using BioRender.com.

### Abbreviations

BCAR3, breast cancer anti-estrogen resistance 3; CSPGs, chondroitin sulfate proteoglycan; ECM, extracellular matrix; EMT, epithelial to mesenchymal transitions; ER, endoplasmic reticulum; FAK, focal adhesion kinase; GAPS, GTPase-activating proteins; GEF, guanine exchange factor; HSPGs, heparan sulfate proteoglycans; JAMs, junctional adhesion molecules; MEFs, mouse embryonic fibroblasts; PTPs, protein tyrosine phosphatases; SFKs, Src family kinases; SH2, Src Homology 2; VE, vascular endothelial; VEGF, Vascular endothelial growth factor; ZO, zonula occludens.

### References

- 1 Chen, M.J., Dixon, J.E. and Manning, G. (2017) Genomics and evolution of protein phosphatases. *Sci. Signal.* **10**, eaag1796 <https://doi.org/10.1126/scisignal.aag1796>
- 2 Geiger, B., Spatz, J.P. and Bershadsky, A.D. (2009) Environmental sensing through focal adhesions. *Nat. Rev. Mol. Cell Biol.* **10**, 21–33 <https://doi.org/10.1038/nrm2593>
- 3 Green, K.J. and Jones, J.C.R. (1996) Desmosomes and hemidesmosomes: structure and function of molecular components. *FASEB J.* **10**, 871–881 <https://doi.org/10.1096/fasebj.10.8.8666164>
- 4 Stepp, M.A., Spurr-Michaud, S., Tisdale, A., Elwell, J. and Gipson, I.K. (1990) A $\beta$ 4 integrin heterodimer is a component of hemidesmosomes. *Proc. Natl Acad. Sci. U.S.A.* **87**, 8970–8974 <https://doi.org/10.1073/pnas.87.22.8970>
- 5 Walko, G., Castañón, M.J. and Wiche, G. (2015) Molecular architecture and function of the hemidesmosome. *Cell Tissue Res.* **360**, 363–378 <https://doi.org/10.1007/s00441-014-2061-z>
- 6 Ross, T.D., Coon, B.G., Yun, S., Baeyens, N., Tanaka, K., Ouyang, M. et al. (2013) Integrins in mechanotransduction. *Curr. Opin. Cell Biol.* **25**, 613–618 <https://doi.org/10.1016/j.ceb.2013.05.006>
- 7 Klapholz, B. and Brown, N.H. (2017) Talin: the master of integrin adhesions. *J. Cell Sci.* **130**, 2435–2446 <https://doi.org/10.1242/jcs.190991>
- 8 Carisey, A. and Ballestrem, C. (2011) Vinculin, an adapter protein in control of cell adhesion signalling. *Eur. J. Cell Biol.* **90**, 157–163 <https://doi.org/10.1016/j.ejcb.2010.06.007>
- 9 Calderwood, D.A. (2004) Integrin activation. *J. Cell Sci.* **117**, 657–666 <https://doi.org/10.1242/jcs.01014>
- 10 Nelson, W.J. (2008) Regulation of cell-cell adhesion by the cadherin-catenin complex. *Biochem. Soc. Trans.* **36**, 149–155 <https://doi.org/10.1042/BST0360149>
- 11 Bays, J.L. and DeMali, K.A. (2017) Vinculin in cell–cell and cell–matrix adhesions. *Cell. Mol. Life Sci.* **74**, 2999–3009 <https://doi.org/10.1007/s00018-017-2511-3>
- 12 Harris, T.J.C. and Tepass, U. (2010) Adherens junctions: from molecules to morphogenesis. *Nat. Rev. Mol. Cell Biol.* **11**, 502–514 <https://doi.org/10.1038/nrm2927>
- 13 Johnson, J.L., Najor, N.A. and Green, K.J. (2014) Desmosomes: regulators of cellular signaling and adhesion in epidermal health and disease. *Cold Spring Harb. Perspect. Med.* **4**, a015297 <https://doi.org/10.1101/cshperspect.a015297>
- 14 Bass-Zubek, A.E., Godsel, L.M., Delmar, M. and Green, K.J. (2009) Plakophilins: multifunctional scaffolds for adhesion and signaling. *Curr. Opin. Cell Biol.* **21**, 708–716 <https://doi.org/10.1016/j.ceb.2009.07.002>
- 15 Balda, M.S. and Matter, K. (2008) Tight junctions at a glance. *J. Cell Sci.* **121**, 3677–3682 <https://doi.org/10.1242/jcs.023887>
- 16 Guan, K.L. and Dixon, J.E. (1991) Evidence for protein-tyrosine-phosphatase catalysis proceeding via a cysteine-phosphate intermediate. *J. Biol. Chem.* **266**, 17026–17030 [https://doi.org/10.1016/S0021-9258\(19\)47335-3](https://doi.org/10.1016/S0021-9258(19)47335-3)
- 17 Andersen, J.N., Mortensen, O.H., Peters, G.H., Drake, P.G., Iversen, L.F., Olsen, O.H. et al. (2001) Structural and evolutionary relationships among protein tyrosine phosphatase domains. *Mol. Cell. Biol.* **21**, 7117–7136 <https://doi.org/10.1128/MCB.21.21.7117-7136.2001>
- 18 Reiterer, V., Pawlowski, K., Desrochers, G., Pause, A., Sharpe, H.J. and Farhan, H. (2020) The dead phosphatases society: a review of the emerging roles of pseudophosphatases. *FEBS J.* **287**, 4198–4220 <https://doi.org/10.1111/febs.15431>
- 19 Flint, A.J., Tiganis, T., Barford, D. and Tonks, N.K. (1997) Development of “substrate-trapping” mutants to identify physiological substrates of protein tyrosine phosphatases. *Proc. Natl Acad. Sci. U.S.A.* **94**, 1680–1685 <https://doi.org/10.1073/pnas.94.5.1680>

- 20 Blanchetot, C., Chagnon, M., Dubé, N., Hallé, M. and Tremblay, M.L. (2005) Substrate-trapping techniques in the identification of cellular PTP targets. *Methods* **35**, 44–53 <https://doi.org/10.1016/j.ymeth.2004.07.007>
- 21 Mercan, F. and Bennett, A.M. (2010) Analysis of protein tyrosine phosphatases and substrates. *Curr. Protoc. Mol. Biol.* <https://doi.org/10.1002/0471142727.mb1816s91>
- 22 Fearnley, G.W., Young, K.A., Edgar, J.R., Antrobus, R., Hay, I.M., Liang, W.C. et al. (2019) The homophilic receptor PTPRK selectively dephosphorylates multiple junctional regulators to promote cell-cell adhesion. *eLife* **8**, 1–41 <https://doi.org/10.7554/eLife.44597>
- 23 Courtney, A.H., Amacher, J.F., Kadlecsek, T.A., Mollenauer, M.N., Au-Yeung, B.B., Kuriyan, J. et al. (2017) A phosphosite within the SH2 domain of Lck regulates its activation by CD45. *Mol Cell* **67**, 498–511.e6 <https://doi.org/10.1016/j.molcel.2017.06.024>
- 24 Frame, M.C., Patel, H., Serrels, B., Lietha, D. and Eck, M.J. (2010) The FERM domain: organizing the structure and function of FAK. *Nat. Rev. Mol. Cell Biol.* **11**, 802–814 <https://doi.org/10.1038/nrm2996>
- 25 Juettner V, V., Kruse, K., Dan, A., Vu, V.H., Khan, Y., Le, J. et al. (2019) VE-PTP stabilizes VE-cadherin junctions and the endothelial barrier via a phosphatase-independent mechanism. *J. Cell Biol.* **218**, 1725–1742 <https://doi.org/10.1083/jcb.201807210>
- 26 Davidson, D. and Veillette, A. (2001) PTP-PEST, a scaffold protein tyrosine phosphatase, negatively regulates lymphocyte activation by targeting a unique set of substrates. *EMBO J.* **20**, 3414–3426 <https://doi.org/10.1093/emboj/20.13.3414>
- 27 Hay, I.M., Fearnley, G.W., Rios, P., Köhn, M., Sharpe, H.J. and Deane, J.E. (2020) The receptor PTPRU is a redox sensitive pseudophosphatase. *Nat. Commun.* **11**, 3219 <https://doi.org/10.1038/s41467-020-17076-w>
- 28 Bernard, G., Zoccola, D., Ticchioni, M., Breittmayer, J.P., Aussel, C. and Bernard, A. (1994) Engagement of the CD45 molecule induces homotypic adhesion of human thymocytes through a LFA-1/ICAM-3-dependent pathway. *J. Immunol.* **152**, 5161–5167 PMID:8189044
- 29 Lorenz, H.M., Harrer, T., Lagoo, A.S., Baur, A., Eger, G. and Kalden, J.R. (1993) CD45 mab induces cell adhesion in peripheral blood mononuclear cells via lymphocyte function-associated antigen-1 (LFA-1) and intercellular cell adhesion molecule 1 (ICAM-1). *Cell Immunol.* **147**, 110–128 <https://doi.org/10.1006/cimm.1993.1052>
- 30 Spertini, F., Wang, A.V.T., Chatila, T. and Geha, R.S. (1994) Engagement of the common leukocyte antigen CD45 induces homotypic adhesion of activated human T cells. *J. Immunol.* **153**, 1593–1602 PMID:7913942
- 31 Volberg, T., Zick, Y., Dror, R., Sabanay, L., Gilon, C., Levitzki, A. et al. (1992) The effect of tyrosine-specific protein phosphorylation on the assembly of adherens-type junctions. *EMBO J.* **11**, 1733–1742 <https://doi.org/10.1002/j.1460-2075.1992.tb05225.x>
- 32 Matsuyoshi, N., Hamaguchi, M., Taniguchi, S., Nagafuchi, A., Tsukita, S. and Takeichi, M. (1992) Cadherin-mediated cell-cell adhesion is perturbed by v-src tyrosine phosphorylation in metastatic fibroblasts. *J. Cell Biol.* **118**, 703–714 <https://doi.org/10.1083/jcb.118.3.703>
- 33 Roura, S., Miravet, S., Piedra, J., De Herreros A, G. and Duñach, M. (1999) Regulation of E-cadherin/catenin association by tyrosine phosphorylation. *J. Biol. Chem.* **274**, 36734–36740 <https://doi.org/10.1074/jbc.274.51.36734>
- 34 Mariner, D.J., Davis, M.A. and Reynolds, A.B. (2004) EGFR signaling to p120-catenin through phosphorylation at Y228. *J. Cell Sci.* **117**, 1339–1350 <https://doi.org/10.1242/jcs.01001>
- 35 Xie, Y., Wang, J., Zhang, Y., Liu, X., Wang, X., Liu, K. et al. (2016) Quantitative profiling of spreading-coupled protein tyrosine phosphorylation in migratory cells. *Sci. Rep.* **6**, 31811 <https://doi.org/10.1038/srep31811>
- 36 Pinheiro, D. and Bellaïche, Y. (2018) Mechanical force-driven adherens junction remodeling and epithelial dynamics. *Dev. Cell* **47**, 3–19 <https://doi.org/10.1016/j.devcel.2018.09.014>
- 37 Rao, R. (2008) Oxidative stress-induced disruption of epithelial and endothelial tight junctions. *Front. Biosci.* **13**, 7210–7226 <https://doi.org/10.2741/3223>
- 38 Capaldo, C.T. and Nusrat, A. (2009) Cytokine regulation of tight junctions. *Biochim. Biophys. Acta Biomembr.* **1788**, 864–871 <https://doi.org/10.1016/j.bbamem.2008.08.027>
- 39 Chiasson-Mackenzie, C. and McClatchey, A.I. (2018) Cell-cell contact and receptor tyrosine kinase signaling. *Cold Spring Harb. Perspect. Biol.* **10**, 1–14 <https://doi.org/10.1101/cshperspect.a029215>
- 40 Mohebani, A.N., Nikolaienko, R.M., Bouyain, S. and Harroch, S. (2013) Receptor-type tyrosine phosphatase ligands: looking for the needle in the haystack. *FEBS J.* **280**, 388–400 <https://doi.org/10.1111/j.1742-4658.2012.08653.x>
- 41 Pincus, D., Letunic, I., Bork, P. and Lim, W.A. (2008) Evolution of the phospho-tyrosine signaling machinery in premetazoan lineages. *Proc. Natl Acad. Sci. U.S.A.* **105**, 9680–9684 <https://doi.org/10.1073/pnas.0803161105>
- 42 Murray, P.S. and Zaidel-Bar, R. (2014) Pre-metazoan origins and evolution of the cadherin adhesome. *Biol. Open* **3**, 1183–1195 <https://doi.org/10.1242/bio.20149761>
- 43 Abedin, M. and King, N. (2008) The premetazoan ancestry of cadherins. *Science* **319**, 946–948 <https://doi.org/10.1126/science.1151084>
- 44 Roux, K.J., Kim, D.I., Raida, M. and Burke, B. (2012) A promiscuous biotin ligase fusion protein identifies proximal and interacting proteins in mammalian cells. *J. Cell Biol.* **196**, 801–810 <https://doi.org/10.1083/jcb.201112098>
- 45 Tan, B., Yatim, S.M.J.M., Peng, S., Gunaratne, J., Hunziker, W. and Ludwig, A. (2020) The mammalian crumbs complex defines a distinct polarity domain apical of epithelial tight junctions. *Curr. Biol.* **30**, 2791–2804.e6 <https://doi.org/10.1016/j.cub.2020.05.032>
- 46 Guo, Z., Neilson, L.J., Zhong, H., Murray, P.S., Zanivan, S. and Zaidel-Bar, R. (2014) E-cadherin interactome complexity and robustness resolved by quantitative proteomics. *Sci Signal.* **7**, rs7 <https://doi.org/10.1126/scisignal.2005473>
- 47 Myllymäki, S.M., Ulla-Reetta, K., Xiaonan, L., Pereira, C.S., Sini, M., Mikko, V. et al. (2019) Assembly of the 4-integrin interactome based on proximal biotinylation in the presence and absence of heterodimerization. *Mol. Cell Proteomics* **18**, 277–293 <https://doi.org/10.1074/mcp.RA118.001095>
- 48 Badu-Nkansah, K.A. and Lechler, T. (2020) Proteomic analysis of desmosomes reveals novel components required for epidermal integrity. *Mol. Biol. Cell* **31**, 1140–1153 <https://doi.org/10.1091/mbc.E19-09-0542>
- 49 Horton, E.R., Byron, A., Askari, J.A., Ng, D.H.J., Millon-Frénilon, A., Robertson, J. et al. (2015) Definition of a consensus integrin adhesome and its dynamics during adhesion complex assembly and disassembly. *Nat. Cell Biol.* **17**, 1577–1587 <https://doi.org/10.1038/ncb3257>
- 50 Chastney, M.R., Lawless, C., Humphries, J.D., Warwood, S., Jones, M.C., Knight, D. et al. (2020) Topological features of integrin adhesion complexes revealed by multiplexed proximity biotinylation. *J. Cell Biol.* **219**, e202003038 <https://doi.org/10.1083/JCB.202003038>
- 51 Couzens, A.L., Knight, J.D.R., Kean, M.J., Teo, G., Weiss, A., Dunham, W.H. et al. (2013) Protein interaction network of the mammalian hippo pathway reveals mechanisms of kinase-phosphatase interactions. *Sci Signal.* **6**, rs15 <https://doi.org/10.1126/scisignal.2004712>



- 52 Kumar, P., Munnangi, P., Chowdary, K.R., Shah, V.J., Shinde, S.R., Kolli, N.R. et al. (2017) A human tyrosine phosphatase interactome mapped by proteomic profiling. *J. Proteome Res.* **16**, 2789–2801 <https://doi.org/10.1021/acs.jproteome.7b00065>
- 53 St-Denis, N., Gupta, G.D., Lin, Z.Y., Gonzalez-Badillo, B., Veri, A.O., Knight, J.D.R. et al. (2016) Phenotypic and interaction profiling of the human phosphatases identifies diverse mitotic regulators. *Cell Rep.* **17**, 2488–2501 <https://doi.org/10.1016/j.celrep.2016.10.078>
- 54 Duan, G., Li, X. and Köhn, M. (2015) The human DEPhosphorylation database DEPOD: a 2015 update. *Nucleic Acids Res.* **43**, D531–D535 <https://doi.org/10.1093/nar/gku1009>
- 55 Takeichi, M. (2014) Dynamic contacts: rearranging adherens junctions to drive epithelial remodelling. *Nat. Rev. Mol. Cell Biol.* **15**, 397–410 <https://doi.org/10.1038/nrm3802>
- 56 Cavey, M. and Lecuit, T. (2009) Molecular bases of cell-cell junctions stability and dynamics. *Cold Spring Harb. Perspect. Biol.* **1**, a002998 <https://doi.org/10.1101/cshperspect.a002998>
- 57 Orsenigo, F., Giampietro, C., Ferrari, A., Corada, M., Galaup, A., Sigismund, S. et al. (2012) Phosphorylation of VE-cadherin is modulated by haemodynamic forces and contributes to the regulation of vascular permeability in vivo. *Nat. Commun.* **3**, 1208 <https://doi.org/10.1038/ncomms2199>
- 58 Fujita, Y., Krause, G., Scheffner, M., Zechner, D., Leddy, H.E.M., Behrens, J. et al. (2002) Hakai, a c-Cbl-like protein, ubiquitinates and induces endocytosis of the E-cadherin complex. *Nat. Cell Biol.* **4**, 222–231 <https://doi.org/10.1038/ncb758>
- 59 Gong, H., Gao, X., Feng, S., Siddiqui, M.R., Garcia, A., Bonini, M.G. et al. (2014) Evidence of a common mechanism of disassembly of adherens junctions through Gα13 targeting of VE-cadherin. *J. Exp. Med.* **211**, 579–591 <https://doi.org/10.1084/jem.20131190>
- 60 Niño, C.A., Sala, S. and Polo, S. (2019) When ubiquitin meets E-cadherin: plasticity of the epithelial cellular barrier. *Semin. Cell Dev. Biol.* **93**, 136–144 <https://doi.org/10.1016/j.semcdb.2018.12.005>
- 61 Park, I. and Lee, H.S. (2015) Ephb/ephrinB signaling in cell adhesion and migration. *Mol. Cells* **38**, 14–19 <https://doi.org/10.14348/molcells.2015.2116>
- 62 Zondag, G.C.M., Reynolds, A.B. and Moolenaar, W.H. (2000) Receptor protein-tyrosine phosphatase RPTPμ binds to and dephosphorylates the catenin p120(ctn). *J. Biol. Chem.* **275**, 11264–11269 <https://doi.org/10.1074/jbc.275.15.11264>
- 63 Castañón, J., Solanas, G., Casagolda, D., Raurell, I., Villagrasa, P., Bustelo, X.R. et al. (2007) Specific phosphorylation of p120-catenin regulatory domain differentially modulates its binding to RhoA. *Mol. Cell Biol.* **27**, 1745–1757 <https://doi.org/10.1128/MCB.01974-06>
- 64 Huvelde, D., Lewis-Tuffin, L.J., Carlson, B.L., Schroeder, M.A., Rodriguez, F., Giannini, C. et al. (2013) Targeting Src family kinases inhibits bevacizumab-induced glioma cell invasion. *PLoS ONE* **8**, e56505 <https://doi.org/10.1371/journal.pone.0056505>
- 65 Takahashi, K., Matafonov, A., Sumarriva, K., Ito, H., Lauhan, C., Zemel, D. et al. (2014) CD148 tyrosine phosphatase promotes cadherin cell adhesion. *PLoS ONE* **9**, e112753 <https://doi.org/10.1371/journal.pone.0112753>
- 66 Schaum, N., Karkanas, J. and Neff, N.F. (2018) Single-cell transcriptomics of 20 mouse organs creates a tabula muris. *Nature* **562**, 367–372 <https://doi.org/10.1038/s41586-018-0590-4>
- 67 Yan, H., Grossman, A., Wang, H., D'Eustachio, P., Mossie, K., Musacchio, J.M. et al. (1993) A novel receptor tyrosine phosphatase-σ that is highly expressed in the nervous system. *J. Biol. Chem.* **268**, 24880–24886 [https://doi.org/10.1016/S0021-9258\(19\)74547-5](https://doi.org/10.1016/S0021-9258(19)74547-5)
- 68 Besco, J.A., Hoof van Huijsduijnen, R., Frostholm, A. and Rotter, A. (2006) Intracellular substrates of brain-enriched receptor protein tyrosine phosphatase rho (RPTPρ/PTPRT). *Brain Res.* **1116**, 50–57 <https://doi.org/10.1016/j.brainres.2006.07.122>
- 69 Truffi, M., Dubreuil, V., Liang, X., Vacaresse, N., Nigon, F., Han, S.P. et al. (2014) RPTPα controls epithelial adherens junctions, linking E-cadherin engagement to c-Src-mediated phosphorylation of cortactin. *J. Cell Sci.* **127**, 2420–2432 <https://doi.org/10.1242/jcs.134379>
- 70 Keilhack, H., Hellman, U., Van Hengel, J., Van Roy, F., Godovac-Zimmermann, J. and Böhmer, F.D. (2000) The protein-tyrosine phosphatase SHP-1 binds to and dephosphorylates p120 catenin. *J. Biol. Chem.* **275**, 26376–26384 <https://doi.org/10.1074/jbc.M001315200>
- 71 Schneidenburger, J., Mayerle, J., Krüger, B., Buchwalow, I., Weiss, F.U., Albrecht, E. et al. (2005) Protein tyrosine phosphatase κ and SHP-1 are involved in the regulation of cell-cell contacts at adherens junctions in the exocrine pancreas. *Gut* **54**, 1445–1455 <https://doi.org/10.1136/gut.2004.063164>
- 72 Ukropec, J.A., Hollinger, M.K., Salva, S.M. and Woolkalis, M.J. (2000) SHP2 association with VE-cadherin complexes in human endothelial cells is regulated by thrombin. *J. Biol. Chem.* **275**, 5983–5986 <https://doi.org/10.1074/jbc.275.8.5983>
- 73 Xu, G., Arregui, C., Lilien, J. and Balsamo, J. (2002) PTP1B modulates the association of β-catenin with N-cadherin through binding to an adjacent and partially overlapping target site. *J. Biol. Chem.* **277**, 49989–49997 <https://doi.org/10.1074/jbc.M206454200>
- 74 Balsamo, J., Arregui, C., Leung, T.C. and Lilien, J. (1998) The nonreceptor protein tyrosine phosphatase PTP1B binds to the cytoplasmic domain of N-cadherin and regulates the cadherin-actin linkage. *J. Cell Biol.* **143**, 523–532 <https://doi.org/10.1083/jcb.143.2.523>
- 75 Balsamo, J., Leung, T.C., Ernst, H., Zanin, M.K.B., Hoffman, S. and Lilien, J. (1996) Regulated binding of a PTP1B-like phosphatase to N-cadherin: control of cadherin-mediated adhesion by dephosphorylation of β-catenin. *J. Cell Biol.* **134**, 801–813 <https://doi.org/10.1083/jcb.134.3.801>
- 76 Winter, M.C., Shasby, S. and Shasby, D.M. (2008) Compromised E-cadherin adhesion and epithelial barrier function with activation of G protein-coupled receptors is rescued by Y-to-F mutations in β-catenin. *Am. J. Physiol. Lung Cell. Mol. Physiol.* **294**, L442–L448 <https://doi.org/10.1152/ajplung.00404.2007>
- 77 Wallez, Y. and Huber, P. (2008) Endothelial adherens and tight junctions in vascular homeostasis, inflammation and angiogenesis. *Biochim. Biophys. Acta Biomembr.* **1778**, 794–809 <https://doi.org/10.1016/j.bbmembr.2007.09.003>
- 78 Conway, D.E., Coon, B.G., Budatha, M., Arsenovic, P.T., Orsenigo, F., Wessel, F. et al. (2017) VE-Cadherin Phosphorylation regulates endothelial fluid shear stress responses through the polarity protein LGN. *Curr. Biol.* **27**, 2219–2225.e5 <https://doi.org/10.1016/j.cub.2017.06.020>
- 79 Bazzoni, G. and Dejana, E. (2004) Endothelial cell-to-cell junctions: molecular organization and role in vascular homeostasis. *Physiol. Rev.* **84**, 869–901 <https://doi.org/10.1152/physrev.00035.2003>
- 80 Lambeng, N., Wallez, Y., Rampon, C., Cand, F., Christé, G., Gulino-Debrac, D. et al. (2005) Vascular endothelial-cadherin tyrosine phosphorylation in angiogenic and quiescent adult tissues. *Circ. Res.* **96**, 384–391 <https://doi.org/10.1161/01.RES.0000156652.99586.9f>
- 81 Jeltsch, M., Leppänen, V.M., Saharinen, P. and Alitalo, K. (2013) Receptor tyrosine kinase-Mediated angiogenesis. *Cold Spring Harb. Perspect. Med.* **5**, a009183 <https://doi.org/10.1101/cshperspect.a009183>
- 82 Koch, S. and Claesson-Welsh, L. (2012) Signal transduction by vascular endothelial growth factor receptors. *Cold Spring Harb. Perspect. Med.* **2**, a006502 <https://doi.org/10.1101/cshperspect.a006502>

- 83 Bäumer, S., Keller, L., Holtmann, A., Funke, R., August, B., Gamp, A. et al. (2006) Vascular endothelial cell-specific phosphotyrosine phosphatase (VE-PTP) activity is required for blood vessel development. *Blood* **107**, 4754–4762 <https://doi.org/10.1182/blood-2006-01-0141>
- 84 Dominguez, M.G., Hughes, V.C., Pan, L., Simmons, M., Daly, C., Anderson, K. et al. (2007) Vascular endothelial tyrosine phosphatase (VE-PTP)-null mice undergo vasculogenesis but die embryonically because of defects in angiogenesis. *Proc. Natl Acad. Sci. U.S.A.* **104**, 3243–3248 <https://doi.org/10.1073/pnas.0611510104>
- 85 Bianchi, C., Sellke, F.W., Del Vecchio, R.L., Tonks, N.K. and Neel, B.G. (1999) Receptor-type protein-tyrosine phosphatase  $\mu$  is expressed in specific vascular endothelial beds in vivo. *Exp. Cell Res.* **248**, 329–338 <https://doi.org/10.1006/excr.1999.4428>
- 86 Fuchs, M., Wang, H., Ciossek, T., Chen, Z. and Ullrich, A. (1998) Differential expression of MAM-subfamily protein tyrosine phosphatases during mouse development. *Mech. Dev.* **70**, 91–109 [https://doi.org/10.1016/S0925-4773\(97\)00179-2](https://doi.org/10.1016/S0925-4773(97)00179-2)
- 87 Sui, X.F., Kiser, T.D., Hyun, S.W., Angelini, D.J., Del Vecchio, R.L., Young, B.A. et al. (2005) Receptor protein tyrosine phosphatase  $\mu$  regulates the paracellular pathway in human lung microvascular endothelia. *Am. J. Pathol.* **166**, 1247–1258 [https://doi.org/10.1016/S0002-9440\(10\)62343-7](https://doi.org/10.1016/S0002-9440(10)62343-7)
- 88 Koop, E.A., Gebbink, M.F.B.G., Sweeney, T.E., Mathy, M.J., Heijnen, H.F.G., Spaan, J.A.E. et al. (2005) Impaired flow-induced dilation in mesenteric resistance arteries from receptor protein tyrosine phosphatase- $\mu$ -deficient mice. *Am. J. Physiol. Heart Circ. Physiol.* **288**, H1218–H1223 <https://doi.org/10.1152/ajpheart.00512.2004>
- 89 Polacheck, W.J., Kutys, M.L., Yang, J., Eyckmans, J., Wu, Y., Vasavada, H. et al. (2017) A non-canonical Notch complex regulates adherens junctions and vascular barrier function. *Nature* **552**, 258–262 <https://doi.org/10.1038/nature24998>
- 90 Besnier, M., Galaup, A., Nicol, L., Henry, J.P., Coquerel, D., Gueret, A. et al. (2014) Enhanced angiogenesis and increased cardiac perfusion after myocardial infarction in protein tyrosine phosphatase 1B-deficient mice. *FASEB J.* **28**, 3351–3361 <https://doi.org/10.1096/fj.13-245753>
- 91 Zhang, J., Li, L., Li, J., Liu, Y., Zhang, C.Y., Zhang, Y. et al. (2015) Protein tyrosine phosphatase 1B impairs diabetic wound healing through vascular endothelial growth factor receptor 2 dephosphorylation. *Arterioscler. Thromb. Vasc. Biol.* **35**, 163–174 <https://doi.org/10.1161/ATVBAHA.114.304705>
- 92 Nakamura, Y., Patrushev, N., Inomata, H., Mehta, D., Urao, N., Kim, H.W. et al. (2008) Role of protein tyrosine phosphatase 1B in VEGF signaling and cell-cell adhesion in endothelial cells. *Circ. Res.* **102**, 1182–1191 <https://doi.org/10.1161/CIRCRESAHA.107.167080>
- 93 Cross, M.J., Dixelius, J., Matsumoto, T. and Claesson-Welsh, L. (2003) VEGF-receptor signal transduction. *Trends Biochem. Sci.* **28**, 488–494 [https://doi.org/10.1016/S0968-0004\(03\)00193-2](https://doi.org/10.1016/S0968-0004(03)00193-2)
- 94 Zihni, C., Mills, C., Matter, K. and Balda, M.S. (2016) Tight junctions: from simple barriers to multifunctional molecular gates. *Nat. Rev. Mol. Cell Biol.* **17**, 564–580 <https://doi.org/10.1038/nrm.2016.80>
- 95 Guillemot, L., Paschoud, S., Pulimeno, P., Foglia, A. and Citi, S. (2008) The cytoplasmic plaque of tight junctions: a scaffolding and signalling center. *Biochim. Biophys. Acta Biomembr.* **1778**, 601–613 <https://doi.org/10.1016/j.bbmem.2007.09.032>
- 96 Shin, K., Fogg, V.C. and Margolis, B. (2006) Tight junctions and cell polarity. *Annu. Rev. Cell Dev. Biol.* **22**, 207–235 <https://doi.org/10.1146/annurev.cellbio.22.010305.104219>
- 97 Staddon, J.M., Herrenknecht, K., Smales, C. and Rubin, L.L. (1995) Evidence that tyrosine phosphorylation may increase tight junction permeability. *J. Cell Sci.* **108**, 609–619 PMID:7769005
- 98 Van Itallie, C.M. and Anderson, J.M. (2018) Phosphorylation of tight junction transmembrane proteins: many sites, much to do. *Tissue Barriers* **6**, e1382671 <https://doi.org/10.1080/21688370.2017.1382671>
- 99 Dörfel, M.J. and Huber, O. (2012) Modulation of tight junction structure and function by kinases and phosphatases targeting occludin. *J. Biomed. Biotechnol.* **2012**, 807356 <https://doi.org/10.1155/2012/807356>
- 100 Antonetti, D.A., Barber, A.J., Hollinger, L.A., Wolpert, E.B. and Gardner, T.W. (1999) Vascular endothelial growth factor induces rapid phosphorylation of tight junction proteins occludin and zonula occluden 1. A potential mechanism for vascular permeability in diabetic retinopathy and tumors. *J. Biol. Chem.* **274**, 23463–23467 <https://doi.org/10.1074/jbc.274.33.23463>
- 101 Farshori, P. and Kachar, B. (1999) Redistribution and phosphorylation of occludin during opening and resealing of tight junctions in cultured epithelial cells. *J. Membr. Biol.* **170**, 147–156 <https://doi.org/10.1007/s002329900544>
- 102 Tsukamoto, T. and Nigam, S.K. (1999) Role of tyrosine phosphorylation in the reassembly of occludin and other tight junction proteins. *Am. J. Physiol.* **276**, F737–F750 <https://doi.org/10.1152/ajprenal.1999.276.5.f737>
- 103 Corderionsi, M., Mazzon, E., De Rigo, L., Baraldo, S., Meggio, F. and Citi, S. (1997) Occludin dephosphorylation in early development of *Xenopus laevis*. *J. Cell Sci.* **110**, 3131–3139 PMID:9365283
- 104 Wong, V. (1997) Phosphorylation of occludin correlates with occludin localization and function at the tight junction. *Am. J. Physiol.* **273**, C1859–C1867 <https://doi.org/10.1152/ajpcell.1997.273.6.c1859>
- 105 Sheth, P., Basuroy, S., Li, C., Naren, A.P. and Rao, R.K. (2003) Role of phosphatidylinositol 3-kinase in oxidative stress-induced disruption of tight junctions. *J. Biol. Chem.* **278**, 49239–49245 <https://doi.org/10.1074/jbc.M305654200>
- 106 Elias, B.C., Suzuki, T., Seth, A., Giorgianni, F., Kale, G., Shan, L. et al. (2009) Phosphorylation of Tyr-398 and Tyr-402 in occludin prevents its interaction with ZO-1 and destabilizes its assembly at the tight junctions. *J. Biol. Chem.* **284**, 1559–1569 <https://doi.org/10.1074/jbc.M804783200>
- 107 Siddiqui, M.R., Mayanil, C.S., Kim, K.S. and Tomita, T. (2015) Angiotensin-1 regulates brain endothelial permeability through PTPN-2 mediated tyrosine dephosphorylation of occludin. *PLoS ONE* **10**, e0130857 <https://doi.org/10.1371/journal.pone.0130857>
- 108 Sallee, J.L. and Burrige, K. (2009) Density-enhanced phosphatase 1 regulates phosphorylation of tight junction proteins and enhances barrier function of epithelial cells. *J. Biol. Chem.* **284**, 14997–15006 <https://doi.org/10.1074/jbc.M901901200>
- 109 Smart, C.E., Askarian Amiri, M.E., Wronski, A., Dinger, M.E., Crawford, J., Ovchinnikov, D.A. et al. (2012) Expression and function of the protein tyrosine phosphatase receptor J (PTPRJ) in normal mammary epithelial cells and breast tumors. *PLoS ONE* **7**, e40742 <https://doi.org/10.1371/journal.pone.0040742>
- 110 Panetti, T.S. (2002) Tyrosine phosphorylation of paxillin, FAK, and p130CAS: effects on cell spreading and migration. *Front. Biosci.* **7**, d143–d150 <https://doi.org/10.2741/a771>
- 111 Xing, Z., Chen, H.C., Nowlen, J.K., Taylor, S.J., Shalloway, D. and Guan, J.L. (1994) Direct interaction of v-Src with the focal adhesion kinase mediated by the Src SH2 domain. *Mol. Biol. Cell* **5**, 413–421 <https://doi.org/10.1091/mbc.5.4.413>
- 112 Serra-Pages, C., Kedersha, N.L., Fazikas, L., Medley, Q., Debant, A. and Streuli, M. (1995) The LAR transmembrane protein tyrosine phosphatase and a coiled-coil LAR-interacting protein co-localize at focal adhesions. *EMBO J.* **14**, 2827–2838 <https://doi.org/10.1002/j.1460-2075.1995.tb07282.x>

- 113 Marchesi, S., Montani, F., Deflorian, G., D'Antuono, R., Cuomo, A., Bologna, S. et al. (2014) DEPDC1B coordinates de-adhesion events and cell-cycle progression at mitosis. *Dev. Cell* **31**, 420–433 <https://doi.org/10.1016/j.devcel.2014.09.009>
- 114 O'Grady, P., Thai, T.C. and Saito, H. (1998) The laminin-nidogen complex is a ligand for a specific splice isoform of the transmembrane protein tyrosine phosphatase LAR. *J. Cell Biol.* **141**, 1675–1684 <https://doi.org/10.1083/jcb.141.7.1675>
- 115 Johnson, K.G., Tenney, A.P., Ghose, A., Duckworth, A.M., Higashi, M.E., Parfitt, K. et al. (2006) The HSPGs syndecan and dallylike bind the receptor phosphatase LAR and exert distinct effects on synaptic development. *Neuron* **49**, 517–531 <https://doi.org/10.1016/j.neuron.2006.01.026>
- 116 Yim, Y.S., Kwon, Y., Nam, J., Yoon, H.I., Lee, K., Kim, D.G. et al. (2013) Slitkrs control excitatory and inhibitory synapse formation with LAR receptor protein tyrosine phosphatases. *Proc. Natl Acad. Sci. U.S.A.* **110**, 4057–4062 <https://doi.org/10.1073/pnas.1209881110>
- 117 Um, J.W., Kim, K.H., Park, B.S., Choi, Y., Kim, D., Kim, C.Y. et al. (2014) Structural basis for LAR-RPTP/Slitk complex-mediated synaptic adhesion. *Nat. Commun.* **5**, 5423 <https://doi.org/10.1038/ncomms6423>
- 118 Xie, X., Luo, L., Liang, M., Zhang, W., Zhang, T., Yu, C. et al. (2020) Structural basis of liprin- $\alpha$ -promoted LAR-RPTP clustering for modulation of phosphatase activity. *Nat. Commun.* **11**, 169 <https://doi.org/10.1038/s41467-019-13949-x>
- 119 Sarhan, A.R., Patel, T.R., Cowell, A.R., Tomlinson, M.G., Hellberg, C., Heath, J.K. et al. (2016) LAR protein tyrosine phosphatase regulates focal adhesions through CDK1. *J. Cell Sci.* **129**, 2962–2971 <https://doi.org/10.1242/jcs.191379>
- 120 Ausavarat, S., Tongkobpetch, S., Praphanphoj, V., Mahatamarat, C., Rojvachiranonda, N., Snaboon, T. et al. (2011) PTPRF is disrupted in a patient with syndromic amastia. *BMC Med. Genet.* **12**, 46 <https://doi.org/10.1186/1471-2350-12-46>
- 121 Schaapveld, R.Q.J., Schepens, J.T.G., Robinson, G.W., Attema, J., Oerlemans, F.T.J.J., Fransen, J.A.M. et al. (1997) Impaired mammary gland development and function in mice lacking LAR receptor-like tyrosine phosphatase activity. *Dev. Biol.* **188**, 134–146 <https://doi.org/10.1006/dbio.1997.8630>
- 122 Yao, Z., Darowski, K., St-Denis, N., Wong, V., Offensperger, F., Villedieu, A. et al. (2017) A global analysis of the receptor tyrosine kinase-protein phosphatase interactome. *Mol. Cell* **65**, 347–360 <https://doi.org/10.1016/j.molcel.2016.12.004>
- 123 Zheng, X.M., Wang, Y. and Fallen, C.J. (1992) Cell transformation and activation of pp60c-src by overexpression of a protein tyrosine phosphatase. *Nature* **359**, 366–339 <https://doi.org/10.1038/359336a0>
- 124 Su, J., Muranjan, M. and Sap, J. (1999) Receptor protein tyrosine phosphatase  $\alpha$  activates Src-family kinases and controls integrin-mediated responses in fibroblasts. *Curr. Biol.* **9**, 505–511 [https://doi.org/10.1016/S0960-9822\(99\)80234-6](https://doi.org/10.1016/S0960-9822(99)80234-6)
- 125 Zeng, L., Si, X., Yu, W.P., Thi Le, H., Ng, K.P., Teng, R.M.H. et al. (2003) PTP $\alpha$  regulates integrin-stimulated FAK autophosphorylation and cytoskeletal rearrangement in cell spreading and migration. *J. Cell Biol.* **160**, 137–146 <https://doi.org/10.1083/jcb.200206049>
- 126 Chen, M., Chen, S.C. and Pallen, C.J. (2006) Integrin-induced tyrosine phosphorylation of protein-tyrosine phosphatase- $\alpha$  is required for cytoskeletal reorganization and cell migration. *J. Biol. Chem.* **281**, 11972–11980 <https://doi.org/10.1074/jbc.M600561200>
- 127 Sun, G., Cheng, S.Y.S., Chen, M., Lim, C.J. and Pallen, C.J. (2012) Protein tyrosine phosphatase phosphotyrosyl-789 binds BCAR3 To position Cas for activation at integrin-mediated focal adhesions. *Mol. Cell Biol.* **32**, 3776–3789 <https://doi.org/10.1128/MCB.00214-12>
- 128 den Hertog, J., Tracy, S. and Hunter, T. (1994) Phosphorylation of receptor protein-tyrosine phosphatase  $\alpha$  on Tyr789, a binding site for the SH3-SH2-SH3 adaptor protein GRB-2 in vivo. *EMBO J.* **13**, 3020–3032 <https://doi.org/10.1002/j.1460-2075.1994.tb06601.x>
- 129 Cheng, S.Y.S., Sun, G., Schlaepfer, D.D. and Pallen, C.J. (2014) Grb2 promotes integrin-induced focal adhesion kinase (FAK) autophosphorylation and directs the phosphorylation of protein tyrosine phosphatase by the Src-FAK kinase complex. *Mol. Cell Biol.* **34**, 348–361 <https://doi.org/10.1128/MCB.00825-13>
- 130 Zheng, X.M., Resnick, R.J. and Shalloway, D. (2000) A phosphotyrosine displacement mechanism for activation of Src by PTP $\alpha$ . *EMBO J* **19**, 964–978 <https://doi.org/10.1093/emboj/19.5.964>
- 131 Zheng, Y., Xia, Y., Hawke, D., Halle, M., Tremblay, M.L., Gao, X. et al. (2009) FAK phosphorylation by ERK primes Ras-induced tyrosine dephosphorylation of FAK mediated by PIN1 and PTP-PEST. *Mol. Cell* **35**, 11–25 <https://doi.org/10.1016/j.molcel.2009.06.013>
- 132 Zheng, Y., Yang, W., Xia, Y., Hawke, D., Liu, D.X. and Lu, Z. (2011) Ras-Induced and extracellular signal-Regulated kinase 1 and 2 phosphorylation-dependent isomerization of protein tyrosine phosphatase (PTP)-PEST by PIN1 promotes FAK dephosphorylation by PTP-PEST. *Mol. Cell Biol.* **31**, 4258–4269 <https://doi.org/10.1128/MCB.05547-11>
- 133 Chen, Z., Morales, J.E., Guerrero, P.A., Sun, H. and McCarty, J.H. (2018) PTPN12/PTP-PEST regulates phosphorylation-dependent ubiquitination and stability of focal adhesion substrates in invasive glioblastoma cells. *Cancer Res.* **78**, 3809–3822 <https://doi.org/10.1158/0008-5472.CAN-18-0085>
- 134 Arregui, C.O., Balsamo, J. and Lilién, J. (1998) Impaired integrin-mediated adhesion and signaling in fibroblasts expressing a dominant, negative mutant PTP1B. *J. Cell Biol.* **143**, 861–873 <https://doi.org/10.1083/jcb.143.3.861>
- 135 Arias-Salgado, E.G., Haj, F., Dubois, C., Moran, B., Kasirer-Friede, A., Furie, B.C. et al. (2005) PTP-1B is an essential positive regulator of platelet integrin signaling. *J. Cell Biol.* **170**, 837–845 <https://doi.org/10.1083/jcb.200503125>
- 136 Fuentes, F. and Arregui, C.O. (2009) Microtubule and cell contact dependency of ER-bound PTP1B localization in growth cones. *Mol. Biol. Cell* **20**, 1865–1877 <https://doi.org/10.1091/mbc.e08-07-0675>
- 137 Buckley, D.A., Cheng, A., Kiely, P.A., Tremblay, M.L. and O'Connor, R. (2002) Regulation of insulin-Like growth factor type I (IGF-I) receptor kinase activity by protein tyrosine phosphatase 1B (PTP-1B) and enhanced IGF-I-mediated suppression of apoptosis and motility in PTP-1B-deficient fibroblasts. *Mol. Cell Biol.* **22**, 1998–2010 <https://doi.org/10.1128/MCB.22.7.1998-2010.2002>
- 138 Pu, Q., Zhuang, D., Thakran, S. and Hassid, A. (2011) Mechanisms related to NO-induced motility in differentiated rat aortic smooth muscle cells. *Am. J. Physiol. Heart Circ. Physiol.* **300**, H101–H108 <https://doi.org/10.1152/ajpheart.00342.2010>
- 139 Liu, F., Sells, M.A. and Chernoff, J. (1998) Protein tyrosine phosphatase 1B negatively regulates integrin signaling. *Curr. Biol.* **8**, 173–176 [https://doi.org/10.1016/S0960-9822\(98\)70066-1](https://doi.org/10.1016/S0960-9822(98)70066-1)
- 140 Mertins, P., Eberl, H.C., Renkawitz, J., Olsen J. V., Tremblay, M.L., Mann, M. et al. (2008) Investigation of protein-tyrosine phosphatase 1B function by quantitative proteomics. *Mol. Cell Proteomics* **7**, 1763–1777 <https://doi.org/10.1074/mcp.M800196-MCP200>
- 141 Stuiblé, M., Dubé, N. and Tremblay, M.L. (2008) PTP1B regulates cactactin tyrosine phosphorylation by targeting Tyr 446. *J. Biol. Chem.* **283**, 15740–15746 <https://doi.org/10.1074/jbc.M710534200>
- 142 Nievergall, E., Janes, P.W., Stegmayer, C., Vail, M.E., Haj, F.G., Teng, S.W. et al. (2010) PTP1B regulates Eph receptor function and trafficking. *J. Cell Biol.* **191**, 1189–1203 <https://doi.org/10.1083/jcb.201005035>

- 143 Frangioni J, V., Beahm, P.H., Shifrin, V., Jost, C.A. and Neel, B.G. (1992) The nontransmembrane tyrosine phosphatase PTP-1B localizes to the endoplasmic reticulum via its 35 amino acid C-terminal sequence. *Cell* **68**, 545–560 [https://doi.org/10.1016/0092-8674\(92\)90190-N](https://doi.org/10.1016/0092-8674(92)90190-N)
- 144 Anderie, I., Schulz, I. and Schmid, A. (2007) Direct interaction between ER membrane-bound PTP1B and its plasma membrane-anchored targets. *Cell Signal.* **19**, 582–592 <https://doi.org/10.1016/j.cellsig.2006.08.007>
- 145 Hernández M, V., Davies Sala, M.G., Balsamo, J., Lilien, J. and Arregui, C.O. (2006) ER-bound PTP1B is targeted to newly forming cell-matrix adhesions. *J. Cell Sci.* **119**, 1233–1243 <https://doi.org/10.1242/jcs.02846>
- 146 Burdizzo, J.E., González, Á. and Arregui, C.O. (2013) PTP1B promotes focal complex maturation, lamellar persistence and directional migration. *J. Cell Sci.* **126**, 1820–1831 <https://doi.org/10.1242/jcs.118828>
- 147 Lawson, C.D. and Burridge, K. (2014) The on-off relationship of Rho and Rac during integrin-mediated adhesion and cell migration. *Small GTPases* **5**, e27958 <https://doi.org/10.4161/sgtp.27958>
- 148 Etienne-Manneville, S. and Hall, A. (2002) Rho GTPases in cell biology. *Nature* **420**, 629–635 <https://doi.org/10.1038/nature01148>
- 149 Patel, M. and Karginov A, V. (2014) Phosphorylation-mediated regulation of GEFs for RhoA. *Cell Adhes. Migr.* **8**, 11–18 <https://doi.org/10.4161/cam.28058>
- 150 Sastry, S.K., Rajfur, Z., Liu, B.P., Cote, J.F., Tremblay, M.L. and Burridge, K. (2006) PTP-PEST couples membrane protrusion and tail retraction via VAV2 and p190RhoGAP. *J. Biol. Chem.* **281**, 11627–11636 <https://doi.org/10.1074/jbc.M600897200>
- 151 Sastry, S.K., Lyons, P.D., Schaller, M.D. and Burridge, K. (2002) PTP-PEST controls motility through regulation of Rac1. *J. Cell Sci.* **115**, 4305–4316 <https://doi.org/10.1242/jcs.00105>
- 152 Grinnell, K.L., Casserly, B. and Harrington, E.O. (2010) Role of protein tyrosine phosphatase SHP2 in barrier function of pulmonary endothelium. *Am. J. Physiol. Lung Cell. Mol. Physiol.* **298**, L361–L370 <https://doi.org/10.1152/ajplung.00374.2009>
- 153 Debant, A., Serra-Pagès, C., Seipel, K., O'Brien, S., Tang, M., Park, S.H. et al. (1996) The multidomain protein trio binds the LAR transmembrane tyrosine phosphatase, contains a protein kinase domain, and has separate rac-specific and rho-specific guanine nucleotide exchange factor domains. *Proc. Natl Acad. Sci. U.S.A.* **93**, 5466–5471 <https://doi.org/10.1073/pnas.93.11.5466>
- 154 Dasgupta, I. and McCollum, D. (2019) Control of cellular responses to mechanical cues through YAP/TAZ regulation. *J. Biol. Chem* **294**, 17693–17706 <https://doi.org/10.1074/jbc.REV119.007963>
- 155 Fulford, A., Tapon, N. and Ribeiro, P.S. (2018) Upstairs, downstairs: spatial regulation of Hippo signalling. *Curr. Opin. Cell Biol* **51**, 22–32 <https://doi.org/10.1016/j.ceb.2017.10.006>
- 156 Karaman, R. and Halder, G. (2018) Cell junctions in Hippo signaling. *Cold Spring Harb. Perspect. Biol.* **10**, a028753 <https://doi.org/10.1101/cshperspect.a028753>
- 157 Wang, W., Huang, J., Wang, X., Yuan, J., Li, X., Feng, L. et al. (2012) PTPN14 is required for the density-dependent control of YAP1. *Genes Dev.* **26**, 1959–1971 <https://doi.org/10.1101/gad.192955.112>
- 158 Liu, X., Yang, N., Figel, S.A., Wilson, K.E., Morrison, C.D., Gelman, I.H. et al. (2013) PTPN14 interacts with and negatively regulates the oncogenic function of YAP. *Oncogene* **32**, 1266–1273 <https://doi.org/10.1038/onc.2012.147>
- 159 Li, X., Tran, K.M., Aziz, K.E., Sorokin A, V., Chen, J. and Wang, W. (2016) Defining the protein-protein interaction network of the human protein tyrosine phosphatase family. *Mol. Cell Proteomics* **15**, 3030–3044 <https://doi.org/10.1074/mcp.M116.060277>
- 160 Meng, Z., Moroishi, T., Mottier-Pavie, V., Plouffe, S.W., Hansen, C.G., Hong, A.W. et al. (2015) MAP4K family kinases act in parallel to MST1/2 to activate LATS1/2 in the Hippo pathway. *Nat. Commun.* **6**, 8357 <https://doi.org/10.1038/ncomms9357>
- 161 Brady-Kalnay, S.M., Flint, A.J. and Tonks, N.K. (1993) Homophilic binding of PTP $\mu$ , a receptor-type protein tyrosine phosphatase, can mediate cell-cell aggregation. *J. Cell Biol.* **122**, 961–972 <https://doi.org/10.1083/jcb.122.4.961>
- 162 Sap, J., Jiang, Y.P., Friedlander, D., Grumet, M. and Schlessinger, J. (1994) Receptor tyrosine phosphatase R-PTP-kappa mediates homophilic binding. *Mol. Cell. Biol.* **14**, 1–9 <https://doi.org/10.1128/MCB.14.1.1>
- 163 Yu, J., Becka, S., Zhang, P., Zhang, X., Brady-Kalnay, S.M. and Wang, Z. (2008) Tumor-derived extracellular mutations of PTPRT/PTP $\rho$  are defective in cell adhesion. *Mol. Cancer Res.* **6**, 1106–1113 <https://doi.org/10.1158/1541-7786.MCR-07-2123>
- 164 Agarwal, S., Al-Keilani, M.S., Alqudah, M.A.Y., Sibenaller, Z.A., Ryken, T.C. and Assem, M. (2013) Tumor derived mutations of protein tyrosine phosphatase receptor type K affect its function and alter sensitivity to chemotherapeutics in glioma. *PLoS ONE* **8**, e62852 <https://doi.org/10.1371/journal.pone.0062852>
- 165 Aricescu, A.R., Siebold, C., Choudhuri, K., Chang, V.T., Lu, W., Davis, S.J. et al. (2007) Structure of a tyrosine phosphatase adhesive interaction reveals a spacer-clamp mechanism. *Science* **317**, 1217–1220 <https://doi.org/10.1126/science.1144646>
- 166 Harrison, O.J., Jin, X., Hong, S., Bahna, F., Ahlsen, G., Brasch, J. et al. (2011) The extracellular architecture of adherens junctions revealed by crystal structures of type I cadherins. *Structure* **19**, 244–256 <https://doi.org/10.1016/j.str.2010.11.016>
- 167 Love, N.R., Chen, Y., Ishibashi, S., Kritsiligkou, P., Lea, R., Koh, Y. et al. (2013) Amputation-induced reactive oxygen species are required for successful *Xenopus* tadpole tail regeneration. *Nat. Cell Biol.* **15**, 222–228 <https://doi.org/10.1038/ncb2659>
- 168 Pak, V.V., Ezeri[?], D., Lyublinskaya, O.G., Pedre, B., Tyurin-Kuzmin, P.A., Mishina, N.M. et al. (2020) Ultrasensitive genetically encoded indicator for hydrogen peroxide identifies roles for the oxidant in cell migration and mitochondrial function. *Cell Metab.* **31**, 642–653.e6 <https://doi.org/10.1016/j.cmet.2020.02.003>
- 169 Wu, W., Hale, A.J., Lemeer, S. and Den Hertog, J. (2017) Differential oxidation of protein-tyrosine phosphatases during zebrafish caudal fin regeneration. *Sci. Rep.* **7**, 8460 <https://doi.org/10.1038/s41598-017-07109-8>
- 170 Hurd, T.R., DeGennaro, M. and Lehmann, R. (2012) Redox regulation of cell migration and adhesion. *Trends Cell Biol.* **22**, 107–115 <https://doi.org/10.1016/j.tcb.2011.11.002>
- 171 Tonks, N.K. (2005) Redox redux: revisiting PTPs and the control of cell signaling. *Cell* **121**, 667–670 <https://doi.org/10.1016/j.cell.2005.05.016>
- 172 Peters, G.H., Frimurer, T.M. and Olsen, O.H. (1998) Electrostatic evaluation of the signature motif (H/V)CX5R(S/T) in protein-tyrosine phosphatases. *Biochemistry* **37**, 5383–5393 <https://doi.org/10.1021/bi971187i>
- 173 Xu, D., Rovira, I.I. and Finkel, T. (2002) Oxidants painting the cysteine chapel: redox regulation of PTPs. *Dev. Cell* **2**, 251–252 [https://doi.org/10.1016/S1534-5807\(02\)00132-6](https://doi.org/10.1016/S1534-5807(02)00132-6)



- 174 Östman, A., Frijhoff, J., Sandin, Å. and Böhrer, F.D. (2011) Regulation of protein tyrosine phosphatases by reversible oxidation. *J. Biochem.* **150**, 345–356 <https://doi.org/10.1093/jb/mvr104>
- 175 Barrett, W.C., DeGnore, J.P., Keng, Y.F., Zhang, Z.Y., Yim, M.B. and Chock, P.B. (1999) Roles of superoxide radical anion in signal transduction mediated by reversible regulation of protein-tyrosine phosphatase 1B. *J. Biol. Chem.* **274**, 34543–34546 <https://doi.org/10.1074/jbc.274.49.34543>
- 176 Holmström, K.M. and Finkel, T. (2014) Cellular mechanisms and physiological consequences of redox-dependent signalling. *Nat. Rev. Mol. Cell Biol.* **15**, 411–421 <https://doi.org/10.1038/nrm3801>
- 177 Finkel, T. (2011) Signal transduction by reactive oxygen species. *J. Cell Biol.* **194**, 7–15 <https://doi.org/10.1083/jcb.201102095>
- 178 Chiarugi, P., Pani, G., Giannoni, E., Taddei, L., Colavitti, R., Raugeri, G. et al. (2003) Reactive oxygen species as essential mediators of cell adhesion: the oxidative inhibition of a FAK tyrosine phosphatase is required for cell adhesion. *J. Cell Biol.* **161**, 933–944 <https://doi.org/10.1083/jcb.200211118>
- 179 Giannoni, E., Buricchi, F., Raugeri, G., Ramponi, G. and Chiarugi, P. (2005) Intracellular reactive oxygen species activate Src tyrosine kinase during cell adhesion and anchorage-dependent cell growth. *Mol. Cell. Biol.* **25**, 6391–6403 <https://doi.org/10.1128/MCB.25.15.6391-6403.2005>
- 180 Wu, R.F., Xu, Y.C., Ma, Z., Nwariaku, F.E., Sarosi, G.A. and Terada, L.S. (2005) Subcellular targeting of oxidants during endothelial cell migration. *J. Cell Biol.* **171**, 893–904 <https://doi.org/10.1083/jcb.200507004>
- 181 Nishiya, N., Iwabuchi, Y., Shibamura, M., Côté, J.F., Tremblay, M.L. and Nose, K. (1999) Hic-5, a paxillin homologue, binds to the protein-tyrosine phosphatase PEST (PTP-PEST) through its LIM 3 domain. *J. Biol. Chem.* **274**, 9847–9853 <https://doi.org/10.1074/jbc.274.14.9847>
- 182 Sundaresan, M., Yu, Z.X., Ferrans, V.J., Sulciner, D.J., Gutkind, J.S., Irani, K. et al. (1996) Regulation of reactive-oxygen-species generation in fibroblasts by Rac1. *Biochem. J.* **318**, 379–382 <https://doi.org/10.1042/bj3180379>
- 183 Sulciner, D.J., Irani, K., Yu, Z.X., Ferrans, V.J., Goldschmidt-Clermont, P. and Finkel, T. (1996) Rac1 regulates a cytokine-stimulated, redox-dependent pathway necessary for NF-kappaB activation. *Mol. Cell. Biol.* **16**, 7115–7121 <https://doi.org/10.1128/MCB.16.12.7115>
- 184 Van Wetering, S., Van Den Berk, N., Van Buul, J.D., Mul, F.P.J., Lommerse, I., Mous, R. et al. (2003) VCAM-1-mediated Rac signaling controls endothelial cell-cell contacts and leukocyte transmigration. *Am. J. Physiol. Cell Physiol.* **285**, C343–C352 <https://doi.org/10.1152/ajpcell.00048.2003>
- 185 van Wetering, S., van Buul, J.D., Quik, S., Mul, F.P.J., Anthony, E.C., ten Klooster, J.P. et al. (2002) Reactive oxygen species mediate Rac-induced loss of cell-cell adhesion in primary human endothelial cells. *J. Cell Sci.* **115**, 1837–1846 PMID:11956315
- 186 Groen, A., Lemeer, S., Van Der Wijk, T., Overvoorde, J., Heck, A.J.R., Ostman, A. et al. (2005) Differential oxidation of protein-tyrosine phosphatases. *J. Biol. Chem.* **280**, 10298–10304 <https://doi.org/10.1074/jbc.M412424200>
- 187 Karisch, R., Fernandez, M., Taylor, P., Virtanen, C., St-Germain, J.R., Jin, L.L. et al. (2011) Global proteomic assessment of the classical protein-tyrosine phosphatome and “redoxome”. *Cell* **146**, 826–840 <https://doi.org/10.1016/j.cell.2011.07.020>
- 188 Xiao, H., Jedrychowski, M.P., Schweppe, D.K., Huttlin, E.L., Yu, Q., Heppner, D.E. et al. (2020) A quantitative tissue-specific landscape of protein redox regulation during aging. *Cell* **180**, 968–983.e24 <https://doi.org/10.1016/j.cell.2020.02.012>
- 189 Burden-Gulley, S.M. and Brady-Kalnay, S.M. (1999) PTP $\mu$  regulates N-cadherin-dependent neurite outgrowth. *J. Cell Biol.* **144**, 1323–1336 <https://doi.org/10.1083/jcb.144.6.1323>
- 190 Fukai, S. and Yoshida, T. (2020) Roles of type IIa receptor protein tyrosine phosphatases as synaptic organizers. *FEBS J.* <https://doi.org/10.1111/febs.15666>
- 191 Krueger, N.X., Van Vactor, D., Wan, H.I., Gelbart, W.M., Goodman, C.S. and Saito, H. (1996) The transmembrane tyrosine phosphatase DLAR controls motor axon guidance in Drosophila. *Cell* **84**, 611–622 [https://doi.org/10.1016/S0092-8674\(00\)81036-3](https://doi.org/10.1016/S0092-8674(00)81036-3)
- 192 Kaufmann, N., DeProto, J., Ranjan, R., Wan, H. and Van Vactor, D. (2002) Drosophila liprin- $\alpha$  and the receptor phosphatase Dlar control synapse morphogenesis. *Neuron* **34**, 27–38 [https://doi.org/10.1016/S0896-6273\(02\)00643-8](https://doi.org/10.1016/S0896-6273(02)00643-8)
- 193 Bateman, J., Shu, H. and Van Vactor, D. (2000) The guanine nucleotide exchange factor trio mediates axonal development in the Drosophila embryo. *Neuron* **26**, 93–106 [https://doi.org/10.1016/S0896-6273\(00\)81141-1](https://doi.org/10.1016/S0896-6273(00)81141-1)
- 194 Weng, Y.L., Liu, N., DiAntonio, A. and Broihier, H.T. (2011) The cytoplasmic adaptor protein caskin mediates Lar signal transduction during Drosophila motor axon guidance. *J. Neurosci.* **31**, 4421–4433 <https://doi.org/10.1523/JNEUROSCI.5230-10.2011>
- 195 Bali, N., Lee, H.K. and Zinn, K. (2020) Sticks and Stones, a conserved cell surface ligand for the type IIa RPTP Lar, regulates neural circuit wiring in Drosophila. *bioRxiv* <https://doi.org/10.1101/2020.11.03.367540>
- 196 Grahammer, F., Schell, C. and Huber, T.B. (2013) The podocyte slit diaphragm: from a thin grey line to a complex signalling hub. *Nat. Rev. Nephrol.* **9**, 587–598 <https://doi.org/10.1038/nrneph.2013.169>
- 197 Harrington, R.J., Gutch, M.J., Hengartner, M.O., Tonks, N.K. and Chisholm, A.D. (2002) The *C. elegans* LAR-like receptor tyrosine phosphatase PTP-3 and VAB-1 Eph receptor tyrosine kinase have partly redundant functions in morphogenesis. *Development* **129**, 2141–2153 PMID:11959824
- 198 Ackley, B.D., Harrington, R.J., Hudson, M.L., Williams, L., Kenyon, C.J., Chisholm, A.D. et al. (2005) The two isoforms of the caenorhabditis elegans leukocyte-common antigen related receptor tyrosine phosphatase PTP-3 function independently in axon guidance and synapse formation. *J. Neurosci.* **25**, 7517–7528 <https://doi.org/10.1523/JNEUROSCI.2010-05.2005>
- 199 Takahashi, H. and Craig, A.M. (2013) Protein tyrosine phosphatases PTP $\delta$ , PTP $\zeta$ , and LAR: presynaptic hubs for synapse organization. *Trends Neurosci.* **36**, 522–534 <https://doi.org/10.1016/j.tins.2013.06.002>
- 200 Sakamoto, K., Ozaki, T., Ko, Y.C., Tsai, C.F., Gong, Y., Morozumi, M. et al. (2019) Glycan sulfation patterns define autophagy flux at axon tip via PTPR $\sigma$ -cortactin axis. *Nat. Chem. Biol.* **15**, 699–709 <https://doi.org/10.1038/s41589-019-0274-x>
- 201 Schormair, B., Kemlink, D., Roeske, D., Eckstein, G., Xiong, L., Lichtner, P. et al. (2008) PTPRD (protein tyrosine phosphatase receptor type delta) is associated with restless legs syndrome. *Nat. Genet.* **40**, 946–948 <https://doi.org/10.1038/ng.190>
- 202 Elia, J., Gai, X., Xie, H.M., Perin, J.C., Geiger, E., Glessner, J.T. et al. (2010) Rare structural variants found in attention-deficit hyperactivity disorder are preferentially associated with neurodevelopmental genes. *Mol. Psychiatry* **15**, 637–646 <https://doi.org/10.1038/mp.2009.57>
- 203 Sakuraba, J., Shintani, T., Tani, S. and Noda, M. (2013) Substrate specificity of R3 receptor-like protein-tyrosine phosphatase subfamily toward receptor protein-tyrosine kinases. *J. Biol. Chem.* **288**, 23421–23431 <https://doi.org/10.1074/jbc.M113.458489>
- 204 Yu, Y., Shintani, T., Takeuchi, Y., Shirasawa, T. and Noda, M. (2018) Protein tyrosine phosphatase receptor type J (PTPRJ) regulates retinal axonal projections by inhibiting Eph and Abl kinases in mice. *J. Neurosci.* **38**, 8345–8363 <https://doi.org/10.1523/JNEUROSCI.0128-18.2018>
- 205 Julien, S.G., Dubé, N., Hardy, S. and Tremblay, M.L. (2011) Inside the human cancer tyrosine phosphatome. *Nat. Rev. Cancer* **11**, 35–49 <https://doi.org/10.1038/nrc2980>

- 206 Hanahan, D. and Weinberg, R.A. (2011) Hallmarks of cancer: the next generation. *Cell* **144**, 646–674 <https://doi.org/10.1016/j.cell.2011.02.013>
- 207 Yang, J., Antin, P., Bex, G., Blanpain, C., Brabletz, T., Bronner, M. et al. (2020) Guidelines and definitions for research on epithelial–mesenchymal transition. *Nat. Rev. Mol. Cell Biol.* **21**, 341–352 <https://doi.org/10.1038/s41580-020-0237-9>
- 208 Dongre, A. and Weinberg, R.A. (2019) New insights into the mechanisms of epithelial–mesenchymal transition and implications for cancer. *Nat. Rev. Mol. Cell Biol.* **20**, 69–84 <https://doi.org/10.1038/s41580-018-0080-4>
- 209 Pastushenko, I., Mauri, F., Song, Y., de Cock, F., Meeusen, B., Swedlund, B. et al. (2020) Fat1 deletion promotes hybrid EMT state, tumour stemness and metastasis. *Nature* **589**, 448–455 <https://doi.org/10.1038/s41586-020-03046-1>
- 210 Pastushenko, I. and Blanpain, C. (2019) EMT transition states during tumor progression and metastasis. *Trends Cell Biol* **29**, 212–226 <https://doi.org/10.1016/j.tcb.2018.12.001>
- 211 Sun, P.H., Ye, L., Mason, M.D. and Jiang, W.G. (2012) Protein tyrosine phosphatase  $\mu$  (PTP  $\mu$  or PTPRM), a negative regulator of proliferation and invasion of breast cancer cells, is associated with disease prognosis. *PLoS ONE* **7**, e50183 <https://doi.org/10.1371/journal.pone.0050183>
- 212 Sun, P.H., Ye, L., Mason, M.D. and Jiang, W.G. (2013) Protein tyrosine phosphatase kappa (PTPRK) is a negative regulator of adhesion and invasion of breast cancer cells, and associates with poor prognosis of breast cancer. *J. Cancer Res. Clin. Oncol.* **139**, 1129–1139 <https://doi.org/10.1007/s00432-013-1421-5>
- 213 Cheung, A.K.L., Ip, J.C.Y., Chu, A.C.H., Cheng, Y., Leong, M.M.L., Ko, J.M.Y. et al. (2015) PTPRG suppresses tumor growth and invasion via inhibition of Akt signaling in nasopharyngeal carcinoma. *Oncotarget* **6**, 13434–13447 <https://doi.org/10.18632/oncotarget.3876>
- 214 Wang, Z.C., Gao, Q., Shi, J.Y., Guo, W.J., Yang, L.X., Liu, X.Y. et al. (2015) Protein tyrosine phosphatase receptor S acts as a metastatic suppressor in hepatocellular carcinoma by control of epithelial growth factor receptor-induced epithelial–mesenchymal transition. *Hepatology* **62**, 1201–1214 <https://doi.org/10.1002/hep.27911>
- 215 Selvaggio, G., Canato, S., Pawar, A., Monteiro, P.T., Guerreiro, P.S., Brás, M.M. et al. (2020) Hybrid epithelial–mesenchymal phenotypes are controlled by microenvironmental factors. *Cancer Res.* **80**, 2407–2420 <https://doi.org/10.1158/0008-5472.CAN-19-3147>
- 216 Yuan, T., Wang, Y., Zhao, Z.J. and Gu, H. (2010) Protein-tyrosine phosphatase PTPN9 negatively regulates ErbB2 and epidermal growth factor receptor signaling in breast cancer cells. *J. Biol. Chem.* **285**, 14861–14870 <https://doi.org/10.1074/jbc.M109.099879>
- 217 Diaz-Valdivia, N.I., Díaz, J., Contreras, P., Campos, A., Rojas-Celis, V., Burgos-Ravanal, R.A. et al. (2020) The non-receptor tyrosine phosphatase type 14 blocks caveolin-1-enhanced cancer cell metastasis. *Oncogene* **39**, 3693–3709 <https://doi.org/10.1038/s41388-020-1242-3>
- 218 Zhu, Z., Liu, Y., Li, K., Liu, J., Wang, H., Sun, B. et al. (2014) Protein tyrosine phosphatase receptor U (PTPRU) is required for glioma growth and motility. *Carcinogenesis* **35**, 1901–1910 <https://doi.org/10.1093/carcin/bgu123>
- 219 Spring, K., Fournier, P., Lapointe, L., Chabot, C., Roussy, J., Pommey, S. et al. (2015) The protein tyrosine phosphatase DEP-1/PTPRJ promotes breast cancer cell invasion and metastasis. *Oncogene* **34**, 5536–5547 <https://doi.org/10.1038/nc.2015.9>
- 220 Krdnja, D., Schmid, H., Eismann, J.L., Lothar, U., Adler, G., Oswald, F. et al. (2010) Substrate stiffness and the receptor-type tyrosine-protein phosphatase alpha regulate spreading of colon cancer cells through cytoskeletal contractility. *Oncogene* **29**, 2724–2738 <https://doi.org/10.1038/nc.2010.25>
- 221 Wu, C.W., Kao, H.L., Li, A.F.Y., Chi, C.W. and Lin, W.C. (2006) Protein tyrosine-phosphatase expression profiling in gastric cancer tissues. *Cancer Lett* **242**, 95–103 <https://doi.org/10.1016/j.canlet.2005.10.046>
- 222 Cai, J., Huang, S., Yi, Y. and Bao, S. (2019) Downregulation of PTPN18 can inhibit proliferation and metastasis and promote apoptosis of endometrial cancer. *Clin. Exp. Pharmacol. Physiol.* **46**, 734–742 <https://doi.org/10.1111/1440-1681.13098>
- 223 Hu, Z.Q., Li, J., Gao, Q., Wei, S. and Yang, B. (2017) SHP2 overexpression enhances the invasion and metastasis of ovarian cancer in vitro and in vivo. *Oncotargets Ther.* **10**, 3881–3891 <https://doi.org/10.2147/OTT.S138833>
- 224 Zancanato, F., Cordenonsi, M. and Piccolo, S. (2016) YAP/TAZ at the roots of cancer. *Cancer Cell* **29**, 783–803 <https://doi.org/10.1016/j.ccell.2016.05.005>
- 225 Moroishi, T., Hansen, C.G. and Guan, K.L. (2015) The emerging roles of YAP and TAZ in cancer. *Nat. Rev. Cancer* **15**, 73–79 <https://doi.org/10.1038/nrc3876>
- 226 Mello, S.S., Valente, L.J., Raj, N., Seoane, J.A., Flowers, B.M., McClendon, J. et al. (2017) A p53 super-tumor suppressor reveals a tumor suppressive p53–Ptpn14–Yap axis in pancreatic cancer. *Cancer Cell* **32**, 460–473.e6 <https://doi.org/10.1016/j.ccell.2017.09.007>
- 227 Bonilla, X., Parmentier, L., King, B., Bezrukov, F., Kaya, G., Zoete, V. et al. (2016) Genomic analysis identifies new drivers and progression pathways in skin basal cell carcinoma. *Nat. Genet.* **48**, 398–406 <https://doi.org/10.1038/ng.3525>
- 228 Sjöblom, T., Jones, S., Wood, L.D., Parsons, D.W., Lin, J., Barber, T.D. et al. (2006) The consensus coding sequences of human breast and colorectal cancers. *Science* **314**, 268–274 <https://doi.org/10.1126/science.1133427>
- 229 Wang, Z., Shen, D., Parsons, D.W., Bardelli, A., Sager, J., Szabo, S. et al. (2004) Mutational analysis of the tyrosine phosphatome in colorectal cancers. *Science* **304**, 1164–1166 <https://doi.org/10.1126/science.1096096>
- 230 Zhang, Z.Y. (2017) Drugging the undruggable: therapeutic potential of targeting protein tyrosine phosphatases. *Acc. Chem. Res.* **50**, 122–129 <https://doi.org/10.1021/acs.accounts.6b00537>
- 231 Stanford, S.M. and Bottini, N. (2017) Targeting tyrosine phosphatases: time to end the stigma. *Trends Pharmacol. Sci.* **38**, 524–540 <https://doi.org/10.1016/j.tips.2017.03.004>
- 232 Wiesmann, C., Barr, K.J., Kung, J., Zhu, J., Erlanson, D.A., Shen, W. et al. (2004) Allosteric inhibition of protein tyrosine phosphatase 1B. *Nat. Struct. Mol. Biol.* **11**, 730–737 <https://doi.org/10.1038/nsmb803>
- 233 Li, K., Hou, X., Li, R., Bi, W., Yang, F., Chen, X. et al. (2019) Identification and structure–function analyses of an allosteric inhibitor of the tyrosine phosphatase PTPN22. *J. Biol. Chem.* **294**, 8653–8663 <https://doi.org/10.1074/jbc.RA118.007129>
- 234 Chio, C.M., Lim, C.S. and Bishop, A.C. (2015) Targeting a cryptic allosteric site for selective inhibition of the oncogenic protein tyrosine phosphatase Shp2. *Biochemistry* **54**, 497–504 <https://doi.org/10.1021/bi5013595>
- 235 Shen, Y., Tenney, A.P., Busch, S.A., Horn, K.P., Cuascut, F.X., Liu, K. et al. (2009) PTP $\sigma$  is a receptor for chondroitin sulfate proteoglycan, an inhibitor of neural regeneration. *Science* **326**, 592–596 <https://doi.org/10.1126/science.1178310>
- 236 Lang, B.T., Cregg, J.M., Depaul, M.A., Tran, A.P., Xu, K., Dyck, S.M. et al. (2015) Modulation of the proteoglycan receptor PTP $\sigma$  promotes recovery after spinal cord injury. *Nature* **518**, 404–408 <https://doi.org/10.1038/nature13974>

- 237 Bilwes, A.M., Den Hertog, J., Hunter, T. and Noel, J.P. (1996) Structural basis for inhibition of receptor protein-tyrosine phosphatase- $\alpha$  by dimerization. *Nature* **382**, 555–559 <https://doi.org/10.1038/382555a0>
- 238 Nam, H.J., Poy, F., Krueger, N.X., Saito, H. and Frederick, C.A. (1999) Crystal structure of the tandem phosphatase domains of RPTP LAR. *Cell* **97**, 449–457 [https://doi.org/10.1016/S0092-8674\(00\)80755-2](https://doi.org/10.1016/S0092-8674(00)80755-2)
- 239 Hoffmann, K.M.V., Tonks, N.K. and Barford, D. (1997) The crystal structure of domain 1 of receptor protein-tyrosine phosphatase  $\mu$ . *J. Biol. Chem.* **272**, 27505–27508 <https://doi.org/10.1074/jbc.272.44.27505>
- 240 Waltenberger, J. (2005) Growth factor signal transduction defects in the cardiovascular system. *Cardiovasc. Res.* **65**, 574–580 <https://doi.org/10.1016/j.cardiores.2004.11.001>
- 241 Wang, Y., Yan, F., Ye, Q., Wu, X. and Jiang, F. (2016) PTP1B inhibitor promotes endothelial cell motility by activating the DOCK180/Rac1 pathway. *Sci. Rep.* **6**, 24111 <https://doi.org/10.1038/srep24111>
- 242 Shen, J., Frye, M., Lee, B.L., Reinardy, J.L., McClung, J.M., Ding, K. et al. (2014) Targeting VE-PTP activates TIE2 and stabilizes the ocular vasculature. *J. Clin. Invest.* **124**, 4564–4576 <https://doi.org/10.1172/JCI74527>
- 243 Aerpio Therapeutics. (2017) The TIME-2b Study: A Study of AKB-9778, a Novel Tie 2 Activator, in Patients With Non-Proliferative Diabetic Retinopathy (NPDR) (TIME-2b). In: Clinicaltrials.Gov
- 244 Goel, S., Gupta, N., Walcott, B.P., Snuderl, M., Kesler, C.T., Kirkpatrick, N.D. et al. (2013) Effects of vascular-endothelial protein tyrosine phosphatase inhibition on breast cancer vasculature and metastatic progression. *J. Natl Cancer Inst.* **105**, 1188–1201 <https://doi.org/10.1093/jnci/djt164>
- 245 Senis, Y.A. and Barr, A.J. (2018) Targeting receptor-type protein tyrosine phosphatases with biotherapeutics: is outside-in better than inside-out? *Molecules* **23**, 569 <https://doi.org/10.3390/molecules23030569>
